# Supplementary material for: Computerised lung sound analysis to improve the specificity of paediatric pneumonia diagnosis in resource-poor settings: protocol and methods for an observational study
Source: PubMed Central journal article supplement — BMJ Open. 2012 Feb 3;2(1):e000506. doi: 10.1136/bmjopen-2011-000506 (PMC3274713; doi:10.1136/bmjopen-2011-000506), 2012-02-03
Supplement: bmjopen-2011-000506.draft_revisions.pdf [file bmjopen-2011-000506.draft_revisions.pdf]

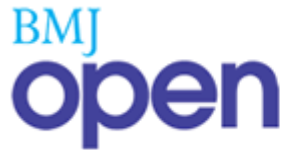

**Computerized lung sound analysis to improve the specificity of pediatric pneumonia diagnosis in resource-poor settings:  
A case-control study**

|                                 |                                                                                                                                                                                                                                                                                                                                                                                                                                                                                                                                                                                                                                                                                                                                                                                                                                                                                                                                                                                                                                                                                                              |
|---------------------------------|--------------------------------------------------------------------------------------------------------------------------------------------------------------------------------------------------------------------------------------------------------------------------------------------------------------------------------------------------------------------------------------------------------------------------------------------------------------------------------------------------------------------------------------------------------------------------------------------------------------------------------------------------------------------------------------------------------------------------------------------------------------------------------------------------------------------------------------------------------------------------------------------------------------------------------------------------------------------------------------------------------------------------------------------------------------------------------------------------------------|
| Journal:                        | <i>BMJ Open</i>                                                                                                                                                                                                                                                                                                                                                                                                                                                                                                                                                                                                                                                                                                                                                                                                                                                                                                                                                                                                                                                                                              |
| Manuscript ID:                  | bmjopen-2011-000506                                                                                                                                                                                                                                                                                                                                                                                                                                                                                                                                                                                                                                                                                                                                                                                                                                                                                                                                                                                                                                                                                          |
| Article Type:                   | Protocol                                                                                                                                                                                                                                                                                                                                                                                                                                                                                                                                                                                                                                                                                                                                                                                                                                                                                                                                                                                                                                                                                                     |
| Date Submitted by the Author:   | 20-Oct-2011                                                                                                                                                                                                                                                                                                                                                                                                                                                                                                                                                                                                                                                                                                                                                                                                                                                                                                                                                                                                                                                                                                  |
| Complete List of Authors:       | <p>Ellington, Laura; Johns Hopkins University<br/>         Gilman, Robert; Johns Hopkins University, Program in Global Disease Epidemiology and Control<br/>         Tielsch, James; Johns Hopkins University, Program in Global Disease Epidemiology and Control<br/>         Steinhoff, Mark; Cincinnati Children's Hospital, Global Health Center; Johns Hopkins University, Program in Global Disease Epidemiology and Control<br/>         Figueroa, Dante; Instituto Nacional de Salud del Nino<br/>         Rodriguez, Shalim; Hospital Nacional Rebagliati, 6. Unidad de Cuidados Intensivos<br/>         Caffo, Brian; Johns Hopkins University, Department of Biostatistics<br/>         Tracey, Brian; Tufts University, Department of Electrical and Computer Engineering<br/>         Elhilali, Mounya; Johns Hopkins University, Department of Electrical and Computer Engineering<br/>         West, James; Johns Hopkins University, Department of Electrical and Computer Engineering<br/>         Checkley, William; Johns Hopkins University, Division of Pulmonary and Critical Care</p> |
| <b>Primary Subject Heading</b>: | Global health                                                                                                                                                                                                                                                                                                                                                                                                                                                                                                                                                                                                                                                                                                                                                                                                                                                                                                                                                                                                                                                                                                |
| Secondary Subject Heading:      | Diagnostics, Paediatrics, Infectious diseases, Public health                                                                                                                                                                                                                                                                                                                                                                                                                                                                                                                                                                                                                                                                                                                                                                                                                                                                                                                                                                                                                                                 |
| Keywords:                       | Respiratory infections < THORACIC MEDICINE, Paediatric thoracic medicine < THORACIC MEDICINE, Paediatric infectious disease & immunisation < PAEDIATRICS, Public health < INFECTIOUS DISEASES                                                                                                                                                                                                                                                                                                                                                                                                                                                                                                                                                                                                                                                                                                                                                                                                                                                                                                                |
|                                 |                                                                                                                                                                                                                                                                                                                                                                                                                                                                                                                                                                                                                                                                                                                                                                                                                                                                                                                                                                                                                                                                                                              |

SCHOLARONE™  
Manuscripts

1  
2  
3  
4  
5  
6  
7  
8  
9  
10  
11  
12  
13  
14  
15  
16  
17  
18  
19  
20  
21  
22  
23  
24  
25  
26  
27  
28  
29  
30  
31  
32  
33  
34  
35  
36  
37  
38  
39  
40  
41  
42  
43  
44  
45  
46  
47  
48  
49  
50  
51  
52  
53  
54  
55  
56  
57  
58  
59  
60

For peer review only

1  
2  
3 **1 Computerized lung sound analysis to improve the specificity of pediatric pneumonia**  
4  
5 **2 diagnosis in resource-poor settings: A case-control study**  
6  
7  
8  
9  
10  
11  
12  
13  
14  
15  
16  
17  
18  
19

4 Laura E Ellington (1), Robert H Gilman (2, 3), James M Tielsch (2), Mark Steinhoff (2, 4),  
5 Dante Figueroa (5), Shalim Rodriguez (6), Brian Caffo (7), Brian Tracey (8), Mounya Elhilali  
6 (9), James West (9), William Checkley (1).  
7

- 8 1. Division of Pulmonary and Critical Care, Johns Hopkins University, Baltimore, USA.  
9 2. Program in Global Disease Epidemiology and Control, Johns Hopkins University, Baltimore,  
10 USA.  
11 3. Asociación Benéfica PRISMA, Lima, Peru.  
12 4. Global Health Center, Cincinnati Children's Hospital, Cincinnati, USA.  
13 5. Instituto Nacional de Salud del Niño, Lima, Peru.  
14 6. Unidad de Cuidados Intensivos, Hospital Nacional Rebagliati, Lima, Peru.  
15 7. Department of Biostatistics, Johns Hopkins University, Baltimore, USA.  
16 8. Department of Electrical and Computer Engineering, Tufts University, Boston, USA.  
17 9. Department of Electrical and Computer Engineering, Johns Hopkins University, Baltimore,  
18 USA.

1  
2  
3 19  
4 20 **Corresponding author:**

5  
6  
7 21 William Checkley, MD, PhD

8  
9 22 The Johns Hopkins University

10  
11 23 Division of Pulmonary and Critical Care

12  
13 24 1830 Monument St, Fifth Floor

14  
15 25 Baltimore, MD 21205

16  
17 26 Telephone: 443-287-8741

18  
19  
20  
21 27

22  
23 28 **Word count:** 3,860.

24  
25  
26 29

27  
28 30 **Keywords:** Electronic auscultation; sensitivity and specificity; pneumonia; diagnosis

29  
30 31 [subheading]; child

31  
32  
33 32

34  
35 33 **Funding sources:** Funding for this study and support for Laura Ellington was provided by the

36  
37 34 Doris Duke Charitable Foundation Clinical Research Fellowship (no grant number).

38  
39  
40 35

41  
42 36 **Acknowledgements:** Additional support came from A.B. PRISMA, Instituto Nacional de Salud

43  
44 37 del Niño, and collaborators at JHU, Tufts University, Cincinnati Children's Hospital, and

45  
46 38 Hospital Nacional Rebagliati. Thinklabs Medical (Centennial, CO) generously provided us with

47  
48 39 an electronic stethoscope, at discount.

49  
50  
51  
52  
53  
54  
55  
56  
57  
58  
59  
60

1  
2  
3  
4  
5  
6  
7  
8  
9  
10  
11  
12  
13  
14  
15  
16  
17  
18  
19  
20  
21  
22  
23  
24  
25  
26  
27  
28  
29  
30  
31  
32  
33  
34  
35  
36  
37  
38  
39  
40  
41  
42  
43  
44  
45  
46  
47  
48  
49  
50  
51  
52  
53  
54  
55  
56  
57  
58  
59  
60

## ARTICLE FOCUS

- We seek to characterize lung sounds associated with different respiratory illnesses in children using electronic auscultation and determine whether these sounds can be differentiated from normal through computerized lung sound analysis.
- We summarize the study design and methods with standardized protocols for electronic auscultation and chest ultrasound in children.

## KEY MESSAGES

- We aim to develop a protocol for increased specificity of pediatric pneumonia diagnosis in developing countries.

## STRENGTHS AND LIMITATIONS

- Our study is limited by the case definitions available. With no gold standard for many pediatric respiratory diseases, we will rely on clinical exam findings and chest radiography.
- By investigating a number of novel and commonly used diagnostic tools for a variety of respiratory diseases in children, we will gain valuable information regarding the diagnostic potential of each, with a main focus on the electronic stethoscope.

1  
2  
3 59  
4  
5  
6 60**ABSTRACT**

7  
8 **Introduction:** The World Health Organization (WHO) case management algorithm for pediatric  
9 pneumonia relies solely on symptoms of shortness of breath or cough and tachypnea for  
10  
11  
12  
13  
14  
15  
16  
17  
18  
19  
20  
21  
22  
23  
24  
25  
26  
27  
28  
29  
30  
31  
32  
33  
34  
35  
36  
37  
38  
39  
40  
41  
42  
43  
44  
45  
46  
47  
48  
49  
50  
51  
52  
53  
54  
55  
56  
57  
58  
59  
60

61 **Introduction:** The World Health Organization (WHO) case management algorithm for pediatric  
62 pneumonia relies solely on symptoms of shortness of breath or cough and tachypnea for  
63 treatment and has poor diagnostic specificity, tends to increase antibiotic resistance. Alternatives,  
64 including oxygen saturation measurement, chest ultrasound, and chest auscultation exist but with  
65 potential disadvantages. Electronic auscultation has potential for improved detection of pediatric  
66 pneumonia but has yet to be standardized. We aim to investigate the use of electronic  
67 auscultation to improve the specificity of the current WHO algorithm in developing countries.

68 **Methods:** Our study is designed to test the hypothesis that pulmonary pathology can be  
69 differentiated from normal using computerized lung sound analysis (CLSA). We will record lung  
70 sounds from 600 children aged  $\leq 5$  years, 100 each with consolidative pneumonia, diffuse  
71 interstitial pneumonia, asthma, bronchiolitis, upper respiratory infections, and normal lungs at a  
72 children's hospital in Lima, Peru. We will compare CLSA with the WHO algorithm and other  
73 detection approaches, including physical exam findings, chest ultrasound, and microbiologic  
74 testing to construct an improved algorithm for pneumonia diagnosis.

75 **Ethics and dissemination:** Approval was obtained from the Ethics Committees of A.B.  
76 PRISMA, Instituto Nacional de Salud del Niño and Johns Hopkins School of Medicine.  
77 Dissemination will include publications following the study and the development of a free online  
78 library of lung sounds for improvement of CLSA, future research, and clinical education.

79 **Discussion:** This study will develop standardized methods for electronic auscultation, and chest  
80 ultrasound, and compare their utility for detection of pneumonia to standard approaches.  
81 Utilizing signal processing techniques, we aim to characterize lung sounds and through machine

1  
2  
3 82 learning, develop a classification system to distinguish pathologic sounds. Data will allow a  
4  
5  
6 83 better understanding of the benefits and limitations of novel diagnostic techniques in pediatric  
7  
8 84 pneumonia.  
9  
10  
11  
12  
13  
14  
15  
16  
17  
18  
19  
20  
21  
22  
23  
24  
25  
26  
27  
28  
29  
30  
31  
32  
33  
34  
35  
36  
37  
38  
39  
40  
41  
42  
43  
44  
45  
46  
47  
48  
49  
50  
51  
52  
53  
54  
55  
56  
57  
58  
59  
60

For peer review only

85

86 **INTRODUCTION**

87 Acute lower respiratory infection (ALRI) is the leading cause of death in children under 5 years  
 88 of age. Pneumonia alone is responsible for killing 1.6 million children worldwide. The World  
 89 Health Organization (WHO) developed a case management algorithm that relies solely on  
 90 symptoms of shortness of breath or cough, an elevated respiratory rate, and chest indrawing for  
 91 the diagnosis of pneumonia and administration of antibiotics and/or referral in resource-poor  
 92 areas (Table 1). Where successfully implemented, this algorithm has resulted in a 30-40%  
 93 reduction in case mortality[1] but has

94 moderate sensitivity and poor specificity,

95 ranging from 16% for children presenting

96 with wheeze[2] and 49% for nonsevere

97 pneumonia to 95% for very severe

98 pneumonia[3]. Hazir and colleagues

99 demonstrated that over 80% of children

100 with WHO-defined non-severe pneumonia

101 had normal chest radiographs (CXR)[4]

**Table 1. WHO Classification of ALRI in Children Presenting with Cough and/or Difficult Breathing**

|                                      |                                                                                                                                   |
|--------------------------------------|-----------------------------------------------------------------------------------------------------------------------------------|
| <b>No pneumonia (cough and cold)</b> | Respiratory rate, breaths/minute<br><50 (infants 2–11 months)<br><40 (children 12–59 months)<br>No lower chest indrawing          |
| <b>Non-severe pneumonia</b>          | Respiratory rate, breaths/minute<br>>50 (infants 2–11 months)<br>>40 (children 12–59 months)<br>No lower chest indrawing          |
| <b>Severe pneumonia</b>              | Lower chest indrawing ± rapid breathing                                                                                           |
| <b>Very severe pneumonia</b>         | At least one of the following:<br>Unable to feed<br>Convulsions<br>Lethargic<br>Stridor at rest<br>Clinically severe malnutrition |

102 and that the resulting case management was equivalent to no treatment in a randomized clinical  
 103 trial[5], only further increasing concern for global antibiotic resistance.

104 Pneumonia is a pathological process resulting in fluid-filled alveoli, and while there are  
 105 multiple potential etiologies, most are infectious. Currently, there is no gold standard for  
 106 detection of bacterial pneumonia requiring treatment. In areas where resources are readily  
 107 available, chest radiography and clinical diagnosis serve as the standard of care for pneumonia



1  
2  
3 108 detection but these are not available in resource-poor settings around the world. Potential  
4  
5 109 alternatives exist within aspects of the physical exam and imaging. Supplementing oxygen  
6  
7  
8 110 saturation measurements with the current WHO algorithm has been shown to increase  
9  
10 111 specificity[6]; however, the normal range in healthy children varies with environmental factors  
11  
12 112 like altitude[7]. Another promising alternative for detection of pediatric pneumonia is lung  
13  
14 113 ultrasound. Ultrasound has the advantage of gathering information from multiple angles and the  
15  
16 114 ability to detect air-fluid differences that are present with pneumonia. Studies suggest that this  
17  
18 115 technique may be more sensitive than radiography and has the added benefit of lack of radiation;  
19  
20 116 however, these studies have all lacked power due to small sample size[8-13]. Cost and  
21  
22 117 availability of skilled ultrasound technicians may limit use in resource-poor settings. Chest  
23  
24 118 auscultation is a valuable tool for detection of respiratory pathology and is used widely in  
25  
26 119 clinical practice. However, limitations include inter-listener variability, subjectivity in the  
27  
28 120 interpretation of lung sounds[14,15], and lack of trained personnel in resource poor settings.  
29  
30 121 Electronic auscultation has the advantage of signal amplification and ambient noise reduction  
31  
32 122 leading to increased signal-to-noise ratio along with its independence on human ear sensitivity to  
33  
34 123 different acoustic frequencies. Furthermore, through computerized lung sound analysis (CLSA),  
35  
36 124 this diagnostic method results in discrete values from a final reading, thereby facilitating  
37  
38 125 standardization. With advancement in electronic stethoscopes and CLSA, there is great potential  
39  
40 126 for improved diagnosis of pediatric pneumonia where multiple diagnostic tools are not readily  
41  
42 127 available.  
43  
44  
45  
46  
47  
48  
49

50 128 In acoustic signal processing, the two commonly studied lung sounds are crackles and  
51  
52 129 wheezes, which constitute unique temporal and frequency characteristics. Crackles have been  
53  
54 130 most commonly associated with pneumonia, whereas wheezes are often observed in patients  
55  
56  
57  
58  
59  
60

1  
2  
3 131 with asthma and bronchiolitis[16]. According to the Computerized Respiratory Sound Analysis  
4  
5 132 (CORSA) Guidelines[17], the frequency of crackles is characterized in the spectrum of 200 to  
6  
7  
8 133 2000 Hz, while wheezes have a frequency spectrum of 100 to 1000 Hz. Wheezes have  
9  
10  
11 134 continuous waveforms (>100 ms duration) with one or more tonal components and a dominant  
12  
13 135 frequency greater than 400 Hz during the expiratory phase. Crackles are short (<20ms), non-  
14  
15 136 periodic waveforms with transitory sharp peaks and broadband frequency content during mid-  
16  
17 137 inspiratory phase. Time-frequency decomposition of lung sounds provides useful information in  
18  
19  
20 138 identifying and localizing adventitious lung sounds in a patient.

21  
22 139 Translating the CLSA characterization of abnormal lung sounds to clinical practice has  
23  
24 140 yet to be achieved. There are a few studies demonstrating potential, yet data is largely lacking,  
25  
26  
27 141 especially in the field of pediatrics. Our group conducted a systematic review and meta-analysis  
28  
29 142 of studies using CLSA for the detection of a variety of respiratory disease in adults, which found  
30  
31 143 an overall sensitivity and specificity of 80% and 85%, respectively, when compared to  
32  
33  
34 144 radiologically confirmed cases, with markedly limited results due to lack of quality and quantity  
35  
36 145 of available data, as well as lack of standardization[16,18-22].

37  
38  
39 146 In this study, we seek to utilize electronic auscultation to record lung sounds of children  
40  
41 147 with various clinical diagnoses: pneumonia (diffuse interstitial and lobar), asthma, bronchiolitis,  
42  
43 148 and upper respiratory infection (URI) in a tertiary care center in Lima, Peru, and determine  
44  
45  
46 149 whether they can be differentiated from normal lung sounds using CLSA. In addition, we aim to  
47  
48 150 compare with imaging modalities of chest radiography and ultrasound. We hypothesize that not  
49  
50 151 only will the sounds profiles of each pulmonary disease pathology differ from normal, but due to  
51  
52  
53 152 unique characteristics of lung sounds associated with bacterial pneumonia versus asthma,  
54  
55 153 bronchiolitis or URI, CLSA may allow differentiation of various acute lower respiratory disease  
56  
57  
58  
59  
60

1  
2  
3 154 processes. With this information in conjunction with additional basic clinical information (i.e.  
4  
5  
6 155 temperature, respiratory rate, oxygen saturation), we believe that a much needed improvement in  
7  
8 156 the detection and case management of pediatric pneumonia is possible.  
9  
10  
11  
12  
13  
14  
15  
16  
17  
18  
19  
20  
21  
22  
23  
24  
25  
26  
27  
28  
29  
30  
31  
32  
33  
34  
35  
36  
37  
38  
39  
40  
41  
42  
43  
44  
45  
46  
47  
48  
49  
50  
51  
52  
53  
54  
55  
56  
57  
58  
59  
60

For peer review only

157

**METHODS****Study objectives**

The primary objectives of this study are to characterize lung sounds associated with various clinical diagnoses: radiologically confirmed consolidative pneumonia and diffuse interstitial pneumonia, bronchiolitis, asthma, and upper respiratory infections, in a pediatric population; and, to determine if these diagnoses can be differentiated from normal through automated lung sounds analysis and compare with modalities of imaging, current WHO algorithm for ALRI case management, and microbiological testing. We then aim to then develop a clinical protocol pairing electronic auscultation with a CLSA algorithm to aid in pneumonia diagnosis.

167

**Study design**

Our design will be a cross-sectional study of lung sounds and other diagnostic modalities from children 2 to 60 months of age presenting with a primary respiratory complaint to the Instituto Nacional de Salud del Niño, a tertiary care hospital in Lima, Peru. Informed consent from parents will be obtained in the Emergency Department (ED), asthma ward, or pulmonary ward where all testing will be performed in a single visit. Parents will be asked to fill out a questionnaire while the physician reports relevant aspects of the physical exam. Electronic auscultation will then be performed, following by imaging and collection of blood, respiratory, urine, and stool samples.

During the initial phase, we will record lung sounds from 600 children from 2 to 59 months of age, 100 each with consolidative pneumonia, diffuse interstitial pneumonia, asthma, bronchiolitis, upper respiratory infections, and normal lungs. The second phase will consist of

1  
2  
3 180 completing our testing set for external validity and comparing CLSA with the current WHO  
4  
5 181 algorithm and other diagnostic tools such as physical exam findings, chest ultrasound, and  
6  
7  
8 182 microbiologic testing, in order to construct an improved algorithm for pneumonia diagnosis.  
9  
10

11 183

### 12 13 184 **Study population**

14  
15 185 Children from 2 to 59 months of age presenting to the ED or in the asthma or pulmonary ward  
16  
17 186 without history of chronic lung disease, excluding asthma, or significant cardiac disease will be  
18  
19  
20 187 invited to participate in the study. Children with respiratory complaints will be invited to  
21  
22 188 participate as potential cases, while those without respiratory complaints and no acute respiratory  
23  
24 189 illness within one month of presentation will be invited to join the study as controls.  
25  
26

27 190 Children will be considered eligible if their parents or guardians are able to provide  
28  
29 191 written informed consent, and they themselves do not require airway management or non-  
30  
31 192 invasive ventilation. Children will be considered ineligible if they have chronic lung diseases  
32  
33 193 other than asthma, such as cystic fibrosis, bronchiectasis, and chronic lung disease of prematurity  
34  
35 194 or significant congenital heart disease. Patients will be considered ineligible post-consent if they  
36  
37 195 were found to have more than one active respiratory diagnosis upon further testing. Group  
38  
39 196 classification also may be modified post-consent and further enrollment required depending on  
40  
41 197 chest x-ray (CXR) final readings and microbiological testing for diagnosis.  
42  
43  
44  
45

46 198

### 47 48 199 **Outcomes and case definitions**

49  
50 200 Because there is no gold standard for diagnosis, we aim to compare our results with common  
51  
52 201 case definitions and clinical diagnoses by experienced physicians. Secondary outcomes will  
53  
54  
55  
56  
57  
58  
59  
60

1  
2  
3 202 incorporate etiology information from standard culture and molecular techniques; however, these  
4  
5 203 additional data will not serve as the gold standard.  
6  
7

8 204 Pneumonia will be initially categorized upon clinical diagnosis by examining  
9  
10 205 pediatricians at El Instituto Nacional de Salud del Niño and further characterized as  
11  
12 206 consolidative or diffuse interstitial pneumonia given final CXR reading by blinded radiologists  
13  
14 207 from the Johns Hopkins University. Asthma will be defined by the presence of wheeze on  
15  
16 208 physical exam, history of asthma, and improvement with bronchodilators. Bronchiolitis will be  
17  
18 209 defined as the presence of wheeze and difficulty breathing on physical exam and viral symptoms  
19  
20 210 (cough, rhinorrhea), no history of asthma, and little or no improvement with bronchodilators if  
21  
22 211 attempted. URI will be defined as respiration rate less than 50 breaths per minute and associated  
23  
24 212 with one or more of the following: clear nasal secretions, sore or red throat, or hoarseness.  
25  
26  
27  
28  
29  
30

213

### 31 214 **Sample size**

32  
33  
34 215 Our recruitment goal is 600 subjects, 100 each with consolidative pneumonia, diffuse interstitial  
35  
36 216 pneumonia, asthma, bronchiolitis, URI, and normal lungs. Sample size was powered to improve  
37  
38 217 specificity of the WHO algorithm upon the addition of electronic auscultation. To detect an  
39  
40 218 improvement in diagnostic specificity from 50% (WHO algorithm for pediatric pneumonia) to  
41  
42 219 80% (CLSA and WHO algorithm) with 95% power and  $\alpha$  of 0.05 between pneumonia and non-  
43  
44 220 pneumonia cases, we require 70 patients per group in the training set. We will also recruit a test  
45  
46 221 set consisting of an additional 30 patients per group (30% of total sample) to estimate areas  
47  
48 222 under the curve for our diagnostic algorithm. Each group will be over-enrolled by twenty to  
49  
50 223 account for post-consent ineligibility, for a total of 720.  
51  
52  
53  
54

224

## 225 **Study organization**

226 A.B. PRISMA in Lima, Peru, and Johns Hopkins University in Baltimore, USA, will provide  
227 administrative oversight for the study. There will be a research coordinator at a central location  
228 in Lima, Peru, who will provide logistical support and management of the study team. Instituto  
229 Nacional de Salud del Niño will provide a team of study nurses and physicians to carry out  
230 recruitment, physical examination, and collection of specimens. Hospital Edgardo Rebagliati  
231 Martins will provide an ultrasonographer for imaging at his institution and team member training  
232 to carry out chest ultrasonography at Hospital del Niño. A multidisciplinary team of clinicians,  
233 field epidemiologists, acoustical engineers, and biostatisticians from Johns Hopkins University,  
234 Tufts University, Cincinnati Children's Hospital, and Instituto Nacional de Salud del Niño will  
235 be involved with study design and conduct, statistical analysis, and reporting of results.

236

## 237 **Questionnaire**

238 We will ask the parent or guardian about the child's past medical history, environmental  
239 exposures, access to healthcare, and current respiratory symptoms. We will inquire about  
240 demographic information, nutrition, and vaccination history. We will ask about co-morbidities,  
241 family history, and developmental history. Environmental questions pertained to housing,  
242 number of children, rural versus urban living, parent occupations, smoke and allergen exposure,  
243 and sick contacts. Current respiratory symptoms were asked of the parent or guardian to answer  
244 subjectively and included rapid breathing, difficulty breathing, chest indrawing, cyanosis, cough,  
245 sputum production, audible breath sounds, and subjective fever.

246

## 247 **Physical exam and laboratory testing**

1  
2  
3 248 The initial set of vital signs will be recorded, including pulse oximetry. During the physical  
4  
5  
6 249 exam, a single examining physician from the larger group of study physicians will be responsible  
7  
8 250 for recording findings for a given patient with emphasis on the respiratory exam. Chest  
9  
10  
11 251 retractions, nasal flaring, grunting, stridor, and accessory muscle use will be noted and  
12  
13 252 characterized if present, along with any adventitious lung sounds appreciated by physician and  
14  
15 253 study team member on chest auscultation. Degree of improvement after bronchodilators will also  
16  
17 254 be recorded if administered. Additionally, signs of dehydration and malnutrition will be reported  
18  
19  
20 255 if present. Laboratory results will be recorded if evaluated by the ED and include complete blood  
21  
22 256 count, electrolytes, and arterial blood gas.  
23

24  
25  
26  
27 257

### 28 **Electronic Auscultation**

29 259 Parents will be allowed to position the patient supine or upright. The study team member will  
30  
31  
32 260 listen to eight auscultation sites using a ThinkLabs ds32a Digital Stethoscope and mp3 recorder,  
33  
34 261 for 10 seconds at each site, in the following order of placement: front top left and right,  
35  
36 262 fronterolateral bottom right and left, back top right and left, and back bottom left and right  
37  
38  
39 263 (Figure 1). Auscultation will be performed at the participant's normal breathing patterns during  
40  
41 264 recording without being asked to take deep breaths. We will allow only one repeat of  
42  
43 265 auscultation if recording is interrupted for any reason or due to unacceptable signal quality of the  
44  
45 266 first recording.  
46  
47

48  
49  
50  
51 267

### 52 **Lung ultrasound**

53 269 All participants will receive bilateral lung ultrasonography carried out on SonoSite portable  
54  
55 270 ultrasound machine with HFL38/13-6MHz and P17/5-1MHz MicroMaxx® transducers by a  
56  
57  
58  
59  
60



1  
2  
3 271 single ultrasound technician who has been trained to the standardized protocol. Patients will be  
4  
5  
6 272 examined in the supine position with each hemithorax divided into six sections: 2 anterior, 2  
7  
8 273 lateral, and 2 posterior. The posterior area is defined from the posterior axillary line to the  
9  
10 274 paravertebral line. Longitudinal and oblique scans will be obtained at each of the chest zones.  
11  
12 275 Longitudinal scans allow visualization of the ribs with the pleural line under them[23].  
13  
14  
15 276 Representative images from each section will be saved and later transferred to radiologists at an  
16  
17 277 outside institution.

18  
19  
20 278 To assess for pneumonia, 2 of 3 radiologists must agree on the description of ultrasound  
21  
22 279 images compatible with pneumonia. Consolidation will be determined by 1) the presence of  
23  
24 280 hypo- or anechoic images with loss of distinct pleural lines and 2) an irregular shredded border  
25  
26  
27 281 of the pleural line that is distinct from the lung line, termed the “shred sign.” Additional signs to  
28  
29 282 be reported will include punctate hyperechoic images reflecting air bronchograms, decreased  
30  
31 283 lung sliding, and homogenous, hypoechoic images in the pleural space corresponding to pleural  
32  
33 284 effusions. Interstitial infiltrates will be determined by the presence of “lung rockets,” which  
34  
35  
36 285 correlate to three or more B-lines in a longitudinal view between two ribs. Additional features to  
37  
38 286 be reported include heterogenous echotexture, air and fluid bronchograms, lung pulse, and  
39  
40 287 additional B-lines [23].  
41  
42  
43  
44 288

#### 45 46 289 **Chest radiography**

47  
48 290 All case participants will undergo chest radiography. We will attempt postero-anterior and lateral  
49  
50 291 films but will allow an antero-posterior view if not possible. Digital images will be sent to a third  
51  
52 292 party reading group blinded to clinical information. Using the WHO standardization of CXR  
53  
54  
55 293 interpretation for pediatric pneumonia [24], radiologists will comment on quality as adequate,  
56  
57  
58  
59  
60

1  
2  
3 294 suboptimal, or unreadable and on the presence of pathology as consolidative or interstitial with  
4  
5  
6 295 or without pleural effusions. Radiographic evidence of pneumonia will be confirmed by  
7  
8 296 agreement by 2 out of 3 radiologist reports for a given patient. Additional pathologic findings not  
9  
10  
11 297 previously characterized will also be recorded and reported to the patient's physician for further  
12  
13 298 intervention if necessary.

14  
15 299

### 17 300 **Microbiological studies**

20 301 Blood, urine, and nasopharyngeal samples will be collected according to our study design  
21  
22 302 (Figure 2). Blood samples will be drawn for cultures and sensitivities. Urine will be tested for  
23  
24 303 detection of pneumococcal antigen and stored for PCR. Nasopharyngeal swabs will be tested for  
25  
26  
27 304 respiratory viruses, along with culture and sensitivities. Respiratory pathogens tested by PCR  
28  
29 305 will include *Streptococcus pneumoniae*, *Haemophilus influenzae*, and respiratory syncytial virus.  
30  
31

32 306

### 34 307 **Safety**

36 308 In order to ensure safety, the researcher collecting data is experienced with providing care to  
37  
38 309 children. The researcher will use this experience to minimize any discomfort the children may  
39  
40  
41 310 have. All blood samples will be collected by a skilled nurse or phlebotomist.

43 311 We will adhere to hospital procedures for avoiding hospital acquired infections. We will  
44  
45  
46 312 wash hands with soap and water or alcohol-based hand sanitizer before patient contact. We will  
47  
48 313 wear gloves, gowns and mask when required. We will clean the devices using alcohol swabs  
49  
50  
51 314 before and after each use.

52  
53 315

### 55 316 **Data quality and management**

1  
2  
3 317 Prior to data collection, a Manual of Operations will be developed to ensure standardization and  
4  
5  
6 318 reliability and contain detailed instructions for all study procedures and guidelines for data  
7  
8 319 collection. The manual will be revised as needed and distributed to members of the study team.  
9

10 320 All data are recorded first on paper case report forms and subsequently double-entered  
11  
12 321 using Microsoft ACCESS. Data sets will be cross-validated and errors corrected. Electronic lung  
13  
14 322 recordings will be transferred from the mp3 player to participant-specific files on the study  
15  
16 323 computer at least every other day and backed-up weekly. Digital CXR images will also be  
17  
18 324 uploaded to these files and backed-up similarly.  
19

20  
21  
22 325

### 23 24 326 **Analysis of lung sounds and statistics**

25  
26  
27 327 An important first step in CLSA is using common signal processing techniques to investigate  
28  
29 328 high and low frequency information using methods such as the Short-time Fourier Transform  
30  
31 329 (STFT), wavelet transforms, and P-spline bases. The second step will be extracting signal  
32  
33 330 processing features to train the classifier.  
34  
35

36 331 Based on preliminary recordings to date performed by our group in Baltimore (Figure 3),  
37  
38 332 we anticipate that wheeze can be characterized using features from the Fourier transform, such as  
39  
40 333 the existence and temporal stability of tonal peaks in the 300-1000 Hz range, while crackles  
41  
42 334 could be recognized using features such as amplitude, the presence of broad-band energy and the  
43  
44 335 duration of this energy. Features such as the decrease in signal energy with frequency can  
45  
46 336 characterize movement sounds. We have previously used time-frequency descriptors such as  
47  
48 337 Mel-frequency cepstral coefficients as features and anticipate they will be useful for CLSA but  
49  
50 338 may require temporal information as well. We will use the extracted features from signal  
51  
52 339 processing analyses for classification using machine learning algorithms including: nearest  
53  
54  
55  
56  
57  
58  
59  
60

1  
2  
3 340 neighbor methods, support vector machines, random forests, and gradient boosting. Primary  
4  
5 341 analysis will consist of a five-fold cross validation on the training set to calculate expected  
6  
7  
8 342 prediction errors. The training set will additionally be used to estimate areas under the curve for  
9  
10 343 our diagnostic algorithm, including CLSA, WHO algorithm, imaging, and physical exam  
11  
12 344 findings. Secondary analysis will include calculating sensitivities and specificities of  
13  
14 345 experimental diagnostic US for detection of pneumonia when compared to gold standards  
15  
16 346 (clinical diagnosis and CXR reading). Performance will be measured using logistic and  
17  
18 347 multinomial regression, receiver operating characteristic curves, and area under the curve.  
19  
20  
21  
22 348

## 23 24 349 **ETHICS AND DISSEMINATION**

25  
26 350 Approval was obtained from the Ethics Committees of A.B. PRISMA in Lima, Peru, El Instituto  
27  
28 351 Nacional de Salud del Niño in Lima, Peru, and the Johns Hopkins University School of Medicine  
29  
30 352 in Baltimore, MD. Written informed consent will be obtained from a parent or guardian. Any  
31  
32 353 clinical information gained from participation in this study that could possibly change  
33  
34 354 management will be given to the child's physician for his/her discretion. All data and sensitive  
35  
36 355 information will be protected by being kept on encrypted devices or accessible only to study  
37  
38  
39 356 members.  
40  
41  
42

43 357 Plans for dissemination include final publication following completion of the study  
44  
45 358 following the STARD guidelines for reporting diagnostic accuracy[25]. We aim to develop a free  
46  
47 359 online library of lung sounds for further enhancement of CLSA and the machine learning  
48  
49 360 algorithm, as well as for future research and clinical education.  
50  
51  
52  
53  
54  
55  
56  
57  
58  
59  
60

1  
2  
3 3614  
5  
6 362 **DISCUSSION**

7  
8 363 This study aims to investigate alternatives to improve the specificity of the WHO algorithm for  
9  
10 364 pediatric pneumonia, namely electronic auscultation and chest ultrasonography. Utilizing  
11  
12 365 electronic auscultation, we intend to characterize and analyze lung sounds associated with  
13  
14 366 consolidative pneumonia, diffuse interstitial pneumonia, bronchiolitis, asthma, and upper  
15  
16 367 respiratory infections, to determine if these diagnoses can be differentiated from normal through  
17  
18 368 automated lung sounds, and to compare with chest ultrasound, WHO algorithm, and molecular  
19  
20 369 testing for etiology. By reporting a protocol for CLSA, we hope to encourage standardization and  
21  
22 370 expansion of recorded lung sounds via an online library for continued enhancement of machine  
23  
24 371 learning as well as for continued scientific research and clinical education.

25  
26  
27  
28  
29 372 We foresee our greatest challenge in maximizing the quality of recorded lung sounds. To  
30  
31 373 begin the study, we will utilize a commercial electronic stethoscope for recordings, which is  
32  
33 374 identical in design to standard clinical stethoscopes. However, through sound processing using  
34  
35 375 time-frequency analysis methods such as the Short-time Fourier Transform (STFT) and  
36  
37 376 Continuous Wavelet Transforms (CWT), we hope to enhance the signal-to-noise ratio for data  
38  
39 377 analysis and characterization. By examining additional features such as amplitude, we may also  
40  
41 378 be better able to identify crackles and consolidation. We also plan to test alternative recording  
42  
43 379 devices using piezoelectric microphones covered with a thin polymer that may be able to better  
44  
45 380 capture lung sounds. Based on our recordings to date, we anticipate that wheeze can be  
46  
47 381 differentiated from normal breath using features such as the existence and temporal stability of  
48  
49 382 tonal peaks in the 300-1000 Hz range, while crackle should be recognizable using features such  
50  
51 383 as the presence of broad-band energy and the duration of this energy. Features such as the  
52  
53  
54  
55  
56  
57  
58  
59  
60

1  
2  
3 384 decrease in signal energy with frequency can characterize movement sounds. We have  
4  
5  
6 385 previously used time-frequency descriptors borrowed from speech processing (Mel-frequency  
7  
8 386 cepstral coefficients and their time derivatives) and cough-specific time-domain features such as  
9  
10  
11 387 signal rise time and event duration and anticipate they will be useful for CLSA. We will use the  
12  
13 388 extracted features from signal processing analyses for classification using machine learning  
14  
15 389 algorithms such as nearest neighbor methods, support vector machines, or random forests.

16  
17  
18 390 The largest challenge in regards to lung ultrasound will likely be obtaining adequate  
19  
20 391 quality of images and inter-user variability. To reduce variability, the study technician will be  
21  
22 392 trained to systematically scan each subdivided hemithorax for pathologic findings described  
23  
24 393 previously [9,23], and if possible, we will attempt lung ultrasound twice for each patient.

25  
26  
27 394 Ultrasound also takes substantially longer compared to chest radiography because all areas must  
28  
29 395 be adequately explored; therefore, it may be difficult for a child to be cooperative for that length  
30  
31  
32 396 of time. Through our large sample size and detailed methods, we aim to improve standardization  
33  
34 397 of pediatric chest ultrasound and further define pathologic findings associated with disease,  
35  
36 398 which may also lead to more efficient and faster scanning.

37  
38  
39 399 Limitations to this study center mostly on our case definitions for clinical diagnoses. As  
40  
41 400 mentioned previously, there are no precise gold standards and as with many pediatric diseases,  
42  
43 401 diagnosis is clinical. As such, our end points are determined by clinical exam findings by single  
44  
45  
46 402 examining physicians with additional confirmation via radiology for pneumonia cases only. We  
47  
48 403 acknowledge the variability of observed findings among physicians but also accept that this is  
49  
50  
51 404 the mechanism of diagnosis in most clinical settings.

52  
53 405 The WHO algorithm for case management of pediatric pneumonia lacks diagnostic  
54  
55 406 specificity. While clinical information such as elevated heart rate and decreased oxygen  
56  
57  
58  
59  
60

1  
2  
3 407 saturation may aid in degree of illness and monitoring, these data also lack specificity required to  
4  
5  
6 408 drastically improve case management. Lung ultrasound is also a promising tool and offers  
7  
8 409 portability that is not available for radiography. Ultrasound has the added benefit of pleural  
9  
10 410 effusion detection, which may prove an important adjunct to the electronic auscultation  
11  
12 411 algorithm. However, cost and availability of skilled technicians may greatly hamper its utility in  
13  
14 412 resource-poor settings, similar to microbiologic testing. Electronic auscultation is a simple,  
15  
16 413 inexpensive tool that could have great diagnostic impact on ALRI in children worldwide.  
17  
18 414 Through further research, we foresee utilizing this tool with pre-programmed computerized  
19  
20 415 analysis to improve case management in developing countries.  
21  
22  
23  
24  
25  
26  
27  
28  
29  
30  
31  
32  
33  
34  
35  
36  
37  
38  
39  
40  
41  
42  
43  
44  
45  
46  
47  
48  
49  
50  
51  
52  
53  
54  
55  
56  
57  
58  
59  
60

1  
2  
3  
4  
5  
6  
7  
8  
9  
10  
11  
12  
13  
14  
15  
16  
17  
18  
19  
20  
21  
22  
23  
24  
25  
26  
27  
28  
29  
30  
31  
32  
33  
34  
35  
36  
37  
38  
39  
40  
41  
42  
43  
44  
45  
46  
47  
48  
49  
50  
51  
52  
53  
54  
55  
56  
57  
58  
59  
60

416  
417 **COMPETING INTERESTS**

418 All authors in the study report no competing interests.

For peer review only



1  
2  
3 419  
4 420 **AUTHORS' CONTRIBUTIONS**

5  
6  
7 421 All authors were involved in the study design and writing of the manuscript, and all reviewed the  
8  
9 422 final manuscript before submission. Laura Ellington directly contributed to study design, and is  
10  
11 423 responsible for supervision of data gathering at the children's hospital in Lima, electronic  
12  
13 424 auscultation and chest ultrasound recordings, data management, analysis, and writing of this  
14  
15 425 manuscript. Robert Gilman provided mentorship to Laura Ellington and technical support for the  
16  
17 426 study. James Tielsch and Mark Steinhoff contributed to the concept and study design. Dante  
18  
19 427 Figueroa will serve as study physician, provide supervision and administrative oversight on site,  
20  
21 428 and perform physical testing. Shalim Rodriguez contributed to study design and was responsible  
22  
23 429 for developing and training the study technician to a standardized chest ultrasound protocol.  
24  
25 430 Brian Caffo contributed to study design and will contribute to statistical analysis. Brian Tracey,  
26  
27 431 Mounya Elhilali, and James West contributed to study design and will contribute significantly to  
28  
29 432 signal processing and data analysis. William Checkley had ultimate oversight over study design  
30  
31 433 and administration, and was equally responsible writing of the manuscript, and serves as mentor  
32  
33 434 to Laura Ellington throughout the conduct of the study.  
34  
35  
36  
37  
38  
39  
40  
41  
42  
43  
44  
45  
46  
47  
48  
49  
50  
51  
52  
53  
54  
55  
56  
57  
58  
59  
60

435

436 **REFERENCES**

- 437 1 Sazawal S, Black RE. Effect of pneumonia case management on mortality in neonates,  
438 infants, and preschool children: a meta-analysis of community-based trials. *The Lancet*  
439 *Infectious Diseases* 2003;**3**:547–56.
- 440 2 Cardoso M-R a, Nascimento-Carvalho CM, Ferrero F, *et al.* Adding fever to WHO criteria  
441 for diagnosing pneumonia enhances the ability to identify pneumonia cases among  
442 wheezing children. *Archives of disease in childhood* 2011;**96**:58–61.
- 443 3 Puumalainen T, Quiambao B, Abucejo-Ladesma E, *et al.* Clinical case review: a method  
444 to improve identification of true clinical and radiographic pneumonia in children meeting  
445 the World Health Organization definition for pneumonia. *BMC infectious diseases*  
446 2008;**8**:95.
- 447 4 Hazir T, Nisar YB, Qazi S a, *et al.* Chest radiography in children aged 2-59 months  
448 diagnosed with non-severe pneumonia as defined by World Health Organization:  
449 descriptive multicentre study in Pakistan. *BMJ (Clinical research ed)* 2006;**333**:629.
- 450 5 Hazir T, Nisar YB, Abbasi S, *et al.* Comparison of oral amoxicillin with placebo for the  
451 treatment of world health organization-defined nonsevere pneumonia in children aged 2-  
452 59 months: a multicenter, double-blind, randomized, placebo-controlled trial in Pakistan.  
453 *Clinical infectious diseases: an official publication of the Infectious Diseases Society of*  
454 *America* 2011;**52**:293–300.
- 455 6 Madico G, Gilman RH, Jabra A, *et al.* The role of pulse oximetry: its use as an indicator  
456 of severe respiratory disease in Peruvian children living at sea level. *Archives of*  
457 *Pediatrics and Adolescent Medicine* 1995;**149**:1259.

- 1  
2  
3 458 7 Schult S, Canelo-Aybar C. Oxygen saturation in healthy children aged 5 to 16 years  
4  
5  
6 459 residing in Huayllay, Peru at 4340 m. *High altitude medicine & biology* 2011;**12**:89–92.  
7  
8 460 8 Iuri D, De Candia a, Bazzocchi M. Evaluation of the lung in children with suspected  
9  
10 461 pneumonia: usefulness of ultrasonography. *La Radiologia medica* 2009;**114**:321–30.  
11  
12  
13 462 9 Parlamento S, Copetti R, Di S. Evaluation of lung ultrasound for the diagnosis of  
14  
15 463 pneumonia in the ED. *European Respiratory Journal* 2009:379–84.  
16  
17  
18 464 10 Yang PC, Luh KT, Chang DB, Yu CJ, Kuo SH WH. Ultrasonographic Evaluation of  
19  
20 465 Pulmonary Consolidation. *American Review of Respiratory disease* 1992;**146**:757–62.  
21  
22  
23 466 11 Su YH, Wang M, Block TM, *et al.* Transrenal DNA as a diagnostic tool: Important  
24  
25 467 technical notes. *Annals of the New York Academy of Sciences* 2004;**1022**:81–9.  
26  
27  
28 468 12 Gehmacher o, Mathis G, Kopf A, *et al.* Ultrasound imaging of pneumonia. *Ultrasound in*  
29  
30 469 *med & biol* 1995;**21**:1119–22.  
31  
32 470 13 Lichtenstein D, Lascols N, Mezière G, *et al.* Ultrasound diagnosis of alveolar  
33  
34 471 consolidation in the critically ill. *Intensive care medicine* 2004;**30**:276–81.  
35  
36  
37 472 14 Murphy R, Vyshedskiy A, Charnitsky V, *et al.* Automated lung sound analysis in patients  
38  
39 473 with pneumonia. *Respiratory Care* 2004;**49**:1490–07.  
40  
41  
42 474 15 Grenier M, Gagnon K, Genest J, *et al.* Clinical comparison of acoustic and electronic  
43  
44 475 stethoscopes and design of a new electronic stethoscope. *American Journal of Cardiology*  
45  
46 476 1998;**81**:653–6.  
47  
48  
49 477 16 Gurung A, Scrafford C, Tielsch J, *et al.* Computerized lung sound analysis as a diagnostic  
50  
51 478 aid for the detection of abnormal lung sounds: A systematic review and meta-analysis.  
52  
53 479 *Respiratory Medicine* 2011;**doi:10.101**.

- 1  
2  
3 480 17 Abaza A a, Day JB, Reynolds JS, *et al.* Classification of voluntary cough sound and  
4  
5  
6 481 airflow patterns for detecting abnormal pulmonary function. *Cough (London, England)*  
7  
8 482 2009;**5**:8.  
9  
10 483 18 Reichert S, Gass R, Brandt C, *et al.* Analysis of respiratory sounds: state of the art.  
11  
12 484 *Clinical medicine Circulatory, respiratory and pulmonary medicine* 2008;**2**:45–58.  
13  
14  
15 485 19 Lu X, Bahoura M. An integrated automated system for crackles extraction and  
16  
17 486 classification. *Biomedical Signal Processing and Control* 2008;**3**:244–54.  
18  
19  
20 487 20 Marshall A, Boussakta S. Signal analysis of medical acoustics sounds with applications to  
21  
22 488 chest medicine. *J Franklin Institute* 2007;**344**:230–42.  
23  
24  
25 489 21 Taplidou S, Hadjileontiadis L, Kitsas I, *et al.* On applying continuous wavelet transform  
26  
27 490 in wheeze analysis. *IEEE EMBS* 2004;:3832–5.  
28  
29  
30 491 22 Saeed S, Body R. Auscultating to diagnose pneumonia. *EMJ* 2007;**24**:294–6.  
31  
32 492 23 Volpicelli G, Silva F, Radeos M. Real-time lung ultrasound for the diagnosis of alveolar  
33  
34 493 consolidation and interstitial syndrome in the emergency department. *European Journal of*  
35  
36 494 *Emergency Medicine* 2010;**17**:63–72.  
37  
38  
39 495 24 Standardization of interpretation of chest radiographs for the diagnosis of pneumonia in  
40  
41 496 children World Health Organization Pneumonia Vaccine Trial Investigators ' Group  
42  
43 497 DEPARTMENT OF VACCINES. *World Health* 2001.  
44  
45  
46 498 25 Bossuyt PM, Reitsma JB, Bruns DE, *et al.* Towards complete and accurate reporting of  
47  
48 499 studies of diagnostic accuracy: the STARD initiative. *BMJ (Clinical research ed)*  
49  
50 500 2003;**326**:41–4.  
51  
52  
53  
54  
55  
56  
57  
58  
59  
60

1  
2  
3 501 **Figure 1. Order of auscultation by electronic stethoscope.** The study team member will listen  
4  
5  
6 502 to each site, starting with “A” for 10 seconds each.  
7

8 503

9  
10 504 **Figure 2. Microbiology testing schematic.**  
11

12 505

13  
14  
15 506 **Figure 3. Preliminary data suggest a difference in spectral analysis between children with**  
16  
17 507 **and without wheeze.** Short-time FFT analysis was utilized to visualize spectrograms of a normal  
18  
19  
20 508 control (A) and asthmatic child with active wheeze (B). Representative sample is from  
21  
22 509 preliminary recordings taken from the Emergency Room at the Johns Hopkins Hospital in  
23  
24 510 Baltimore, MD.  
25

26  
27 511  
28  
29  
30  
31  
32  
33  
34  
35  
36  
37  
38  
39  
40  
41  
42  
43  
44  
45  
46  
47  
48  
49  
50  
51  
52  
53  
54  
55  
56  
57  
58  
59  
60

1  
2  
3  
4  
5  
6  
7  
8  
9  
10  
11  
12  
13  
14  
15  
16  
17  
18  
19  
20  
21  
22  
23  
24  
25  
26  
27  
28  
29  
30  
31  
32  
33  
34  
35  
36  
37  
38  
39  
40  
41  
42  
43  
44  
45  
46  
47  
48  
49  
50  
51  
52  
53  
54  
55  
56  
57  
58  
59  
60

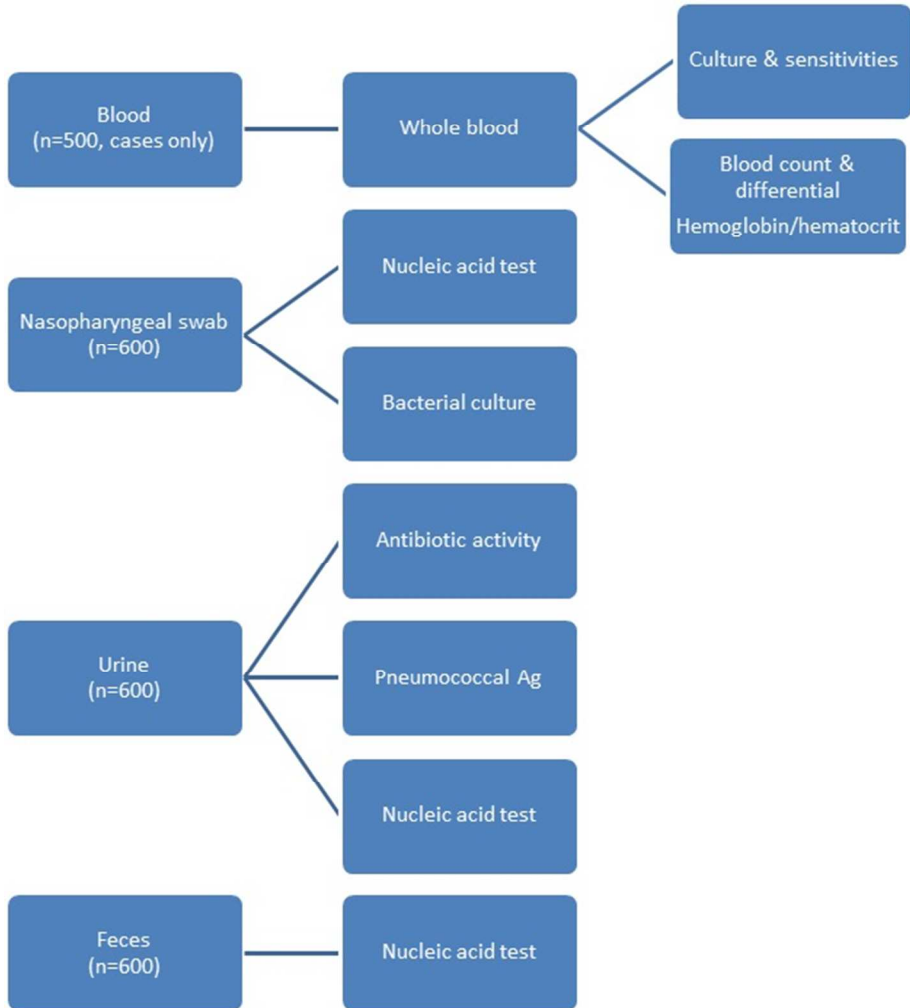

Figure 2. Microbiology testing schematic.  
165x218mm (96 x 96 DPI)

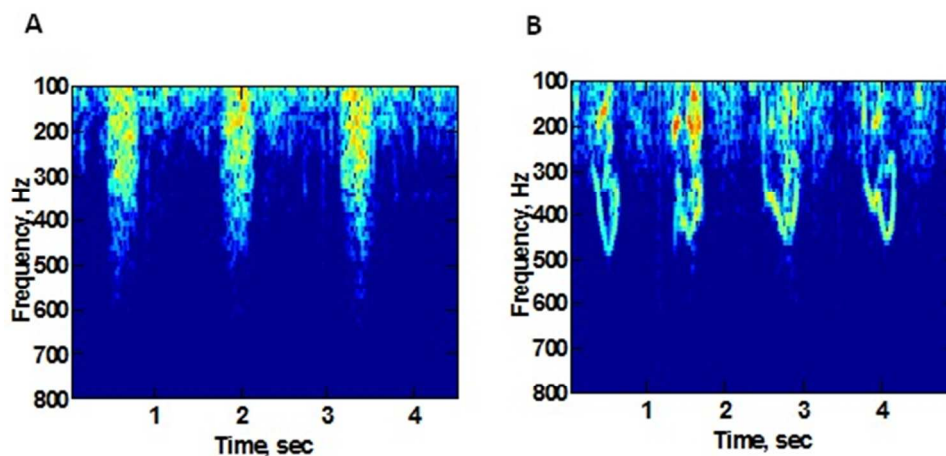

Figure 3. Preliminary data suggest a difference in spectral analysis between children with and without wheeze. Short-time FFT analysis was utilized to visualize spectrograms of a normal control (A) and asthmatic child with active wheeze (B). Representative sample is from preliminary recordings taken from the Emergency Room at the Johns Hopkins Hospital in Baltimore, MD.  
151x74mm (96 x 96 DPI)

**STARD checklist for reporting of studies of diagnostic accuracy**  
(version January 2003)

| Section and Topic           | Item # |                                                                                                                                                                                                                                                     | On page #    |
|-----------------------------|--------|-----------------------------------------------------------------------------------------------------------------------------------------------------------------------------------------------------------------------------------------------------|--------------|
| TITLE/ABSTRACT/<br>KEYWORDS | 1      | Identify the article as a study of diagnostic accuracy (recommend MeSH heading 'sensitivity and specificity').                                                                                                                                      | 1,2          |
| INTRODUCTION                | 2      | State the research questions or study aims, such as estimating diagnostic accuracy or comparing accuracy between tests or across participant groups.                                                                                                | 8,9          |
| METHODS                     |        |                                                                                                                                                                                                                                                     |              |
| <i>Participants</i>         | 3      | The study population: The inclusion and exclusion criteria, setting and locations where data were collected.                                                                                                                                        | 11           |
|                             | 4      | Participant recruitment: Was recruitment based on presenting symptoms, results from previous tests, or the fact that the participants had received the index tests or the reference standard?                                                       | 11           |
|                             | 5      | Participant sampling: Was the study population a consecutive series of participants defined by the selection criteria in item 3 and 4? If not, specify how participants were further selected.                                                      | 11           |
|                             | 6      | Data collection: Was data collection planned before the index test and reference standard were performed (prospective study) or after (retrospective study)?                                                                                        | 10           |
| <i>Test methods</i>         | 7      | The reference standard and its rationale.                                                                                                                                                                                                           | 11,12        |
|                             | 8      | Technical specifications of material and methods involved including how and when measurements were taken, and/or cite references for index tests and reference standard.                                                                            | 14-16        |
|                             | 9      | Definition of and rationale for the units, cut-offs and/or categories of the results of the index tests and the reference standard.                                                                                                                 | 14-16        |
|                             | 10     | The number, training and expertise of the persons executing and reading the index tests and the reference standard.                                                                                                                                 | 11-12, 14-16 |
|                             | 11     | Whether or not the readers of the index tests and reference standard were blind (masked) to the results of the other test and describe any other clinical information available to the readers.                                                     | 11-12        |
| <i>Statistical methods</i>  | 12     | Methods for calculating or comparing measures of diagnostic accuracy, and the statistical methods used to quantify uncertainty (e.g. 95% confidence intervals).                                                                                     | 18           |
|                             | 13     | Methods for calculating test reproducibility, if done.                                                                                                                                                                                              | N/A          |
| RESULTS                     |        |                                                                                                                                                                                                                                                     |              |
| <i>Participants</i>         | 14     | When study was performed, including beginning and end dates of recruitment.                                                                                                                                                                         | N/A          |
|                             | 15     | Clinical and demographic characteristics of the study population (at least information on age, gender, spectrum of presenting symptoms).                                                                                                            | N/A          |
|                             | 16     | The number of participants satisfying the criteria for inclusion who did or did not undergo the index tests and/or the reference standard; describe why participants failed to undergo either test (a flow diagram is strongly recommended).        | N/A          |
| <i>Test results</i>         | 17     | Time-interval between the index tests and the reference standard, and any treatment administered in between.                                                                                                                                        | N/A          |
|                             | 18     | Distribution of severity of disease (define criteria) in those with the target condition; other diagnoses in participants without the target condition.                                                                                             | N/A          |
|                             | 19     | A cross tabulation of the results of the index tests (including indeterminate and missing results) by the results of the reference standard; for continuous results, the distribution of the test results by the results of the reference standard. | N/A          |
|                             | 20     | Any adverse events from performing the index tests or the reference standard.                                                                                                                                                                       | N/A          |
| <i>Estimates</i>            | 21     | Estimates of diagnostic accuracy and measures of statistical uncertainty (e.g. 95% confidence intervals).                                                                                                                                           | N/A          |
|                             | 22     | How indeterminate results, missing data and outliers of the index tests were handled.                                                                                                                                                               | N/A          |
|                             | 23     | Estimates of variability of diagnostic accuracy between subgroups of participants, readers or centers, if done.                                                                                                                                     | N/A          |
|                             | 24     | Estimates of test reproducibility, if done.                                                                                                                                                                                                         | N/A          |
| DISCUSSION                  | 25     | Discuss the clinical applicability of the study findings.                                                                                                                                                                                           | N/A          |



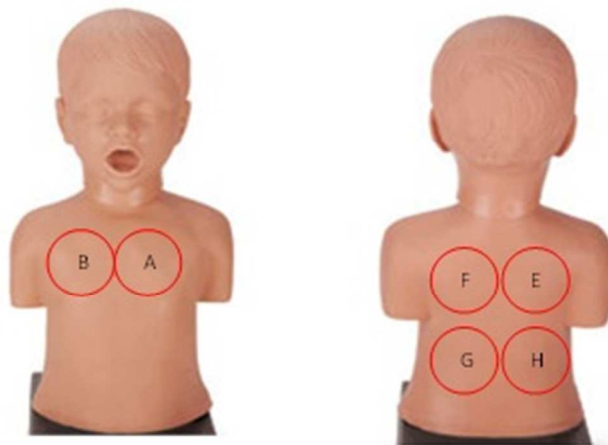

Figure 1. Order of auscultation by electronic stethoscope. The study team member will listen to each site, starting with "A" for 10 seconds each.  
82x60mm (96 x 96 DPI)

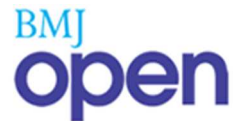

**Computerized lung sound analysis to improve the specificity of pediatric pneumonia diagnosis in resource-poor settings: Protocol and methods for an observational study**

|                                 |                                                                                                                                                                                                                                                                                                                                                                                                                                                                                                                                                                                                                                                                                                                                                                                                                                                                                                                                                                                               |
|---------------------------------|-----------------------------------------------------------------------------------------------------------------------------------------------------------------------------------------------------------------------------------------------------------------------------------------------------------------------------------------------------------------------------------------------------------------------------------------------------------------------------------------------------------------------------------------------------------------------------------------------------------------------------------------------------------------------------------------------------------------------------------------------------------------------------------------------------------------------------------------------------------------------------------------------------------------------------------------------------------------------------------------------|
| Journal:                        | <i>BMJ Open</i>                                                                                                                                                                                                                                                                                                                                                                                                                                                                                                                                                                                                                                                                                                                                                                                                                                                                                                                                                                               |
| Manuscript ID:                  | bmjopen-2011-000506.R1                                                                                                                                                                                                                                                                                                                                                                                                                                                                                                                                                                                                                                                                                                                                                                                                                                                                                                                                                                        |
| Article Type:                   | Protocol                                                                                                                                                                                                                                                                                                                                                                                                                                                                                                                                                                                                                                                                                                                                                                                                                                                                                                                                                                                      |
| Date Submitted by the Author:   | 02-Dec-2011                                                                                                                                                                                                                                                                                                                                                                                                                                                                                                                                                                                                                                                                                                                                                                                                                                                                                                                                                                                   |
| Complete List of Authors:       | Ellington, Laura; Johns Hopkins University, Gilman, Robert; Johns Hopkins University, Program in Global Disease Epidemiology and Control<br>Tielsch, James; Johns Hopkins University, Program in Global Disease Epidemiology and Control<br>Steinhoff, Mark; Cincinnati Children's Hospital, Global Health Center; Johns Hopkins University, Program in Global Disease Epidemiology and Control<br>Figueroa, Dante; Instituto Nacional de Salud del Niño, Rodriguez, Shalim; Hospital Nacional Rebagliati, 6. Unidad de Cuidados Intensivos<br>Caffo, Brian; Johns Hopkins University, Department of Biostatistics<br>Tracey, Brian; Tufts University, Department of Electrical and Computer Engineering<br>Elhilali, Mounya; Johns Hopkins University, Department of Electrical and Computer Engineering<br>West, James; Johns Hopkins University, Department of Electrical and Computer Engineering<br>Checkley, William; Johns Hopkins University, Division of Pulmonary and Critical Care |
| <b>Primary Subject Heading</b>: | Global health                                                                                                                                                                                                                                                                                                                                                                                                                                                                                                                                                                                                                                                                                                                                                                                                                                                                                                                                                                                 |
| Secondary Subject Heading:      | Diagnostics, Paediatrics, Infectious diseases, Public health                                                                                                                                                                                                                                                                                                                                                                                                                                                                                                                                                                                                                                                                                                                                                                                                                                                                                                                                  |
| Keywords:                       | Respiratory infections < THORACIC MEDICINE, Paediatric thoracic medicine < THORACIC MEDICINE, Paediatric infectious disease & immunisation < PAEDIATRICS, Public health < INFECTIOUS DISEASES                                                                                                                                                                                                                                                                                                                                                                                                                                                                                                                                                                                                                                                                                                                                                                                                 |
|                                 |                                                                                                                                                                                                                                                                                                                                                                                                                                                                                                                                                                                                                                                                                                                                                                                                                                                                                                                                                                                               |

SCHOLARONE™  
Manuscripts

1  
2  
3 1 **Computerized lung sound analysis to improve the specificity of pediatric pneumonia**  
4  
5 2 **diagnosis in resource-poor settings: Protocol and methods for an observational study**  
6  
7  
8 3

9  
10 4 Laura E Ellington (1), Robert H Gilman (2, 3), James M Tielsch (2), Mark Steinhoff (2, 4),  
11  
12 5 Dante Figueroa (5), Shalim Rodriguez (6), Brian Caffo (7), Brian Tracey (8), Mounya Elhilali  
13  
14 6 (9), James West (9), William Checkley (1).  
15  
16  
17 7

- 18  
19  
20 8 1. Division of Pulmonary and Critical Care, Johns Hopkins University, Baltimore, USA.  
21  
22 9 2. Program in Global Disease Epidemiology and Control, Johns Hopkins University, Baltimore,  
23  
24 10 USA.  
25  
26 11 3. Asociación Benéfica PRISMA, Lima, Peru.  
27  
28 12 4. Global Health Center, Cincinnati Children's Hospital, Cincinnati, USA.  
29  
30 13 5. Instituto Nacional de Salud del Niño, Lima, Peru.  
31  
32 14 6. Unidad de Cuidados Intensivos, Hospital Nacional Rebagliati, Lima, Peru.  
33  
34 15 7. Department of Biostatistics, Johns Hopkins University, Baltimore, USA.  
35  
36 16 8. Department of Electrical and Computer Engineering, Tufts University, Boston, USA.  
37  
38 17 9. Department of Electrical and Computer Engineering, Johns Hopkins University, Baltimore,  
39  
40 18 USA.  
41  
42  
43  
44  
45  
46 19

1  
2  
3  
4 20 **Corresponding author:**

5 21 William Checkley, MD, PhD

6 22 The Johns Hopkins University

7 23 Division of Pulmonary and Critical Care

8 24 1830 Monument St, Fifth Floor

9 25 Baltimore, MD 21205

10 26 Telephone: 443-287-8741

11 27

12 28 **Word count:** 3,887.

13 29

14 30 **Keywords:** Electronic auscultation; sensitivity and specificity; pneumonia; diagnosis

15 31 [subheading]; child

16 32

17 33 **Funding sources:** Funding for this study and support for Laura Ellington was provided by the

18 34 Doris Duke Charitable Foundation Clinical Research Fellowship.

19 35

20 36 **Acknowledgements:** Additional support came from A.B. PRISMA, Instituto Nacional de Salud

21 37 del Niño, and collaborators at JHU, Tufts University, Cincinnati Children's Hospital, and

22 38 Hospital Nacional Rebagliati. Thinklabs Medical (Centennial, CO) generously provided us with

23 39 an electronic stethoscope, at discount.

24 40

1  
2  
3 41 **ARTICLE FOCUS**  
4

- 5  
6 42 • We seek to characterize lung sounds associated with different respiratory illnesses in  
7  
8 43 children using electronic auscultation and determine whether these sounds can be  
9  
10 44 differentiated from normal through computerized lung sound analysis.  
11  
12 45 • We summarize the study design and methods with standardized protocols for electronic  
13  
14 46 auscultation and chest ultrasound in children.  
15  
16  
17  
18 47

19  
20 48 **KEY MESSAGES**  
21

- 22 49 • We aim to develop a protocol for increased specificity of pediatric pneumonia diagnosis  
23  
24 50 in developing countries.  
25  
26  
27 51

28  
29 52 **STRENGTHS AND LIMITATIONS**  
30  
31

- 32 53 • Our study is limited by the case definitions available. With no gold standard for many  
33  
34 54 pediatric respiratory diseases, we will rely on clinical exam findings and chest  
35  
36 55 radiography.  
37  
38 56 • By investigating a number of novel and commonly used diagnostic tools for a variety of  
39  
40 57 respiratory diseases in children, we will gain valuable information regarding the  
41  
42 58 diagnostic potential of each, with a main focus on the electronic stethoscope.  
43  
44  
45  
46  
47  
48  
49  
50  
51  
52  
53  
54  
55  
56  
57  
58  
59  
60

**ABSTRACT**

**Introduction:** The World Health Organization (WHO) case management algorithm for pediatric pneumonia relies solely on symptoms of shortness of breath or cough and tachypnea for treatment and has poor diagnostic specificity, tends to increase antibiotic resistance. Alternatives, including oxygen saturation measurement, chest ultrasound, and chest auscultation exist but with potential disadvantages. Electronic auscultation has potential for improved detection of pediatric pneumonia but has yet to be standardized. We aim to investigate the use of electronic auscultation to improve the specificity of the current WHO algorithm in developing countries.

**Methods:** Our study is designed to test the hypothesis that pulmonary pathology can be differentiated from normal using computerized lung sound analysis (CLSA). We will record lung sounds from 600 children aged  $\leq 5$  years, 100 each with consolidative pneumonia, diffuse interstitial pneumonia, asthma, bronchiolitis, upper respiratory infections, and normal lungs at a children's hospital in Lima, Peru. We will compare CLSA with the WHO algorithm and other detection approaches, including physical exam findings, chest ultrasound, and microbiologic testing to construct an improved algorithm for pneumonia diagnosis.

**Ethics and dissemination:** Approval was obtained from the Ethics Committees of A.B. PRISMA, Instituto Nacional de Salud del Niño and Johns Hopkins School of Medicine. Dissemination will include publications following the study and the development of a free online library of lung sounds for improvement of CLSA, future research, and clinical education.

**Discussion:** This study will develop standardized methods for electronic auscultation, and chest ultrasound, and compare their utility for detection of pneumonia to standard approaches. Utilizing signal processing techniques, we aim to characterize lung sounds and through machine learning, develop a classification system to distinguish pathologic sounds. Data will allow a

1  
2  
3  
4  
5  
6  
7  
8  
9  
10  
11  
12  
13  
14  
15  
16  
17  
18  
19  
20  
21  
22  
23  
24  
25  
26  
27  
28  
29  
30  
31  
32  
33  
34  
35  
36  
37  
38  
39  
40  
41  
42  
43  
44  
45  
46  
47  
48  
49  
50  
51  
52  
53  
54  
55  
56  
57  
58  
59  
60

82 better understanding of the benefits and limitations of novel diagnostic techniques in pediatric  
83 pneumonia.

For peer review only

## 84 INTRODUCTION

85 Acute lower respiratory infection (ALRI) is the leading cause of death in children under 5 years  
 86 of age. Pneumonia alone is responsible for killing 1.6 million children worldwide. The World  
 87 Health Organization (WHO) developed a case management algorithm that relies solely on  
 88 symptoms of shortness of breath or cough, an elevated respiratory rate, and chest indrawing for  
 89 the diagnosis of pneumonia and administration of antibiotics and/or referral in resource-poor  
 90 areas (Table 1). Where successfully implemented, this algorithm has resulted in a 30-40%  
 91 reduction in case mortality[1] but has

92 moderate sensitivity and poor specificity,  
 93 ranging from 16% for children presenting  
 94 with wheeze[2] and 49% for nonsevere  
 95 pneumonia to 95% for very severe  
 96 pneumonia[3]. Hazir and colleagues  
 97 demonstrated that over 80% of children  
 98 with WHO-defined non-severe pneumonia  
 99 had normal chest radiographs (CXR)[4]

**Table 1. WHO Classification of ALRI in Children Presenting with Cough and/or Difficult Breathing**

|                                      |                                                                                                                                   |
|--------------------------------------|-----------------------------------------------------------------------------------------------------------------------------------|
| <b>No pneumonia (cough and cold)</b> | Respiratory rate, breaths/minute<br><50 (infants 2–11 months)<br><40 (children 12–59 months)<br>No lower chest indrawing          |
| <b>Non-severe pneumonia</b>          | Respiratory rate, breaths/minute<br>>50 (infants 2–11 months)<br>>40 (children 12–59 months)<br>No lower chest indrawing          |
| <b>Severe pneumonia</b>              | Lower chest indrawing ± rapid breathing                                                                                           |
| <b>Very severe pneumonia</b>         | At least one of the following:<br>Unable to feed<br>Convulsions<br>Lethargic<br>Stridor at rest<br>Clinically severe malnutrition |

100 and that the resulting case management was equivalent to no treatment in a randomized clinical  
 101 trial[5], only further increasing concern for global antibiotic resistance.

102 Pneumonia is a pathological process resulting in fluid-filled alveoli, and while there are  
 103 multiple potential etiologies, most are infectious. Currently, there is no gold standard for  
 104 detection of bacterial pneumonia requiring treatment. In areas where resources are readily  
 105 available, chest radiography and clinical diagnosis serve as the standard of care for pneumonia  
 106 detection but these are not available in resource-poor settings around the world. Potential



1  
2  
3 107 alternatives exist within aspects of the physical exam and imaging. Supplementing oxygen  
4  
5 108 saturation measurements with the current WHO algorithm has been shown to increase  
6  
7  
8 109 specificity[6]; however, the normal range in healthy children varies with environmental factors  
9  
10 110 like altitude[7]. Another promising alternative for detection of pediatric pneumonia is lung  
11  
12 111 ultrasound. Ultrasound has the advantage of gathering information from multiple angles and the  
13  
14 112 ability to detect air-fluid differences that are present with pneumonia. Studies suggest that this  
15  
16 113 technique may be more sensitive than radiography and has the added benefit of lack of radiation;  
17  
18 114 however, these studies have all lacked power due to small sample size[8-13]. Cost and  
19  
20 115 availability of skilled ultrasound technicians may limit use in resource-poor settings. Chest  
21  
22 116 auscultation is a valuable tool for detection of respiratory pathology and is used widely in  
23  
24 117 clinical practice. However, limitations include inter-listener variability, subjectivity in the  
25  
26 118 interpretation of lung sounds[14,15], and lack of trained personnel in resource poor settings.  
27  
28 119 Electronic auscultation has the advantage of signal amplification and ambient noise reduction  
29  
30 120 leading to increased signal-to-noise ratio along with its independence on human ear sensitivity to  
31  
32 121 different acoustic frequencies. Furthermore, through computerized lung sound analysis (CLSA),  
33  
34 122 this diagnostic method results in discrete values from a final reading, thereby facilitating  
35  
36 123 standardization. With advancement in electronic stethoscopes and CLSA, there is great potential  
37  
38 124 for improved diagnosis of pediatric pneumonia where multiple diagnostic tools are not readily  
39  
40 125 available.

41  
42  
43 126 In acoustic signal processing, the two commonly studied lung sounds are crackles and  
44  
45 127 wheezes, which constitute unique temporal and frequency characteristics. Crackles have been  
46  
47 128 most commonly associated with pneumonia, whereas wheezes are often observed in patients  
48  
49 129 with asthma and bronchiolitis[16]. According to the Computerized Respiratory Sound Analysis  
50  
51  
52  
53  
54  
55  
56  
57  
58  
59  
60

1  
2  
3 130 (CORSA) Guidelines[17], the frequency of crackles is characterized in the spectrum of 200 to  
4  
5  
6 131 2000 Hz, while wheezes have a frequency spectrum of 100 to 1000 Hz. Wheezes have  
7  
8 132 continuous waveforms (>100 ms duration) with one or more tonal components and a dominant  
9  
10 133 frequency greater than 400 Hz during the expiratory phase. Crackles are short (<20ms), non-  
11  
12 134 periodic waveforms with transitory sharp peaks and broadband frequency content during mid-  
13  
14 135 inspiratory phase. Time-frequency decomposition of lung sounds provides useful information in  
15  
16 136 identifying and localizing adventitious lung sounds in a patient.  
17  
18  
19

20 137 Translating the CLSA characterization of abnormal lung sounds to clinical practice has  
21  
22 138 yet to be achieved. There are a few studies demonstrating potential, yet data is largely lacking,  
23  
24 139 especially in the field of pediatrics. Our group conducted a systematic review and meta-analysis  
25  
26 140 of studies using CLSA for the detection of a variety of respiratory disease in adults, which found  
27  
28 141 an overall sensitivity and specificity of 80% and 85%, respectively, when compared to  
29  
30 142 radiologically confirmed cases, with markedly limited results due to lack of quality and quantity  
31  
32 143 of available data, as well as lack of standardization[16,18-22].  
33  
34  
35

36 144 In this study, we seek to utilize electronic auscultation to record lung sounds of children  
37  
38 145 with various clinical diagnoses: pneumonia (diffuse interstitial and lobar), asthma, bronchiolitis,  
39  
40 146 and upper respiratory infection (URI) in a tertiary care center in Lima, Peru, and determine  
41  
42 147 whether they can be differentiated from normal lung sounds using CLSA. In addition, we aim to  
43  
44 148 compare with imaging modalities of chest radiography and ultrasound. We hypothesize that not  
45  
46 149 only will the sounds profiles of each pulmonary disease pathology differ from normal, but due to  
47  
48 150 unique characteristics of lung sounds associated with bacterial pneumonia versus asthma,  
49  
50 151 bronchiolitis or URI, CLSA may allow differentiation of various acute lower respiratory disease  
51  
52 152 processes. With this information in conjunction with additional basic clinical information (i.e.  
53  
54  
55  
56  
57  
58  
59  
60

1  
2  
3  
4  
5  
6  
7  
8  
9  
10  
11  
12  
13  
14  
15  
16  
17  
18  
19  
20  
21  
22  
23  
24  
25  
26  
27  
28  
29  
30  
31  
32  
33  
34  
35  
36  
37  
38  
39  
40  
41  
42  
43  
44  
45  
46  
47  
48  
49  
50  
51  
52  
53  
54  
55  
56  
57  
58  
59  
60

153 temperature, respiratory rate, oxygen saturation), we believe that a much needed improvement in  
154 the detection and case management of pediatric pneumonia is possible.

For peer review only

## 155 **METHODS**

### 156 **Study objectives**

157 The primary objectives of this study are to characterize lung sounds associated with various  
158 clinical diagnoses: radiologically confirmed consolidative pneumonia and diffuse interstitial  
159 pneumonia, bronchiolitis, asthma, and upper respiratory infections, in a pediatric population;  
160 and, to determine if these diagnoses can be differentiated from normal through automated lung  
161 sounds analysis and compare with modalities of imaging, current WHO algorithm for ALRI case  
162 management, and microbiological testing. We then aim to then develop a clinical protocol  
163 pairing electronic auscultation with a CLSA algorithm to aid in pneumonia diagnosis.

### 165 **Study design**

166 Our design will be a cross-sectional study of lung sounds and other diagnostic modalities from  
167 children 2 to 60 months of age presenting with a primary respiratory complaint to the Instituto  
168 Nacional de Salud del Niño, a tertiary care hospital in Lima, Peru. Informed consent from  
169 parents will be obtained in the Emergency Department (ED), asthma ward, or pulmonary ward  
170 where all testing will be performed in a single visit. Parents will be asked to fill out a  
171 questionnaire while the physician reports relevant aspects of the physical exam. Electronic  
172 auscultation will then be performed, following by imaging and collection of blood, respiratory,  
173 urine, and stool samples.

174 During the initial phase, we will record lung sounds from 600 children from 2 to 59  
175 months of age, 100 each with consolidative pneumonia, diffuse interstitial pneumonia, asthma,  
176 bronchiolitis, upper respiratory infections, and normal lungs. The second phase will consist of  
177 completing our testing set for external validity and comparing CLSA with the current WHO

1  
2  
3 178 algorithm and other diagnostic tools such as physical exam findings, chest ultrasound, and  
4  
5 179 microbiologic testing, in order to construct an improved algorithm for pneumonia diagnosis.  
6  
7

8 180

9  
10 181 **Study population**

11  
12 182 Children from 2 to 59 months of age presenting to the ED or in the asthma or pulmonary ward  
13  
14 183 without a history of chronic lung disease, excluding asthma, or significant cardiac disease will be  
15  
16 184 invited to participate in the study. Children with respiratory complaints will be invited to  
17  
18 185 participate as potential cases, while those without respiratory complaints and no acute respiratory  
19  
20 186 illness within one month of presentation will be invited to join the study as controls.  
21  
22  
23

24 187 Children will be considered eligible if their parents or guardians are able to provide  
25  
26 188 written informed consent, and they themselves do not require airway management or non-  
27  
28 189 invasive ventilation. Children will be considered ineligible if they have chronic lung diseases  
29  
30 190 other than asthma, such as cystic fibrosis, bronchiectasis, and chronic lung disease of prematurity  
31  
32 191 or significant congenital heart disease. Patients will be considered ineligible post-consent if they  
33  
34 192 were found to have more than one active respiratory diagnosis upon further testing. Group  
35  
36 193 classification also may be modified post-consent and further enrollment required depending on  
37  
38 194 chest x-ray (CXR) final readings and microbiological testing for diagnosis.  
39  
40  
41  
42  
43  
44  
45

46 195

46 196 **Outcomes and case definitions**

47  
48 197 Because there is no gold standard for diagnosis, we aim to compare our results with common  
49  
50 198 case definitions and clinical diagnoses by experienced physicians. Secondary outcomes will  
51  
52 199 incorporate etiology information from standard culture and molecular techniques; however, these  
53  
54 200 additional data will not serve as the gold standard.  
55  
56  
57  
58  
59  
60

1  
2  
3 201 Pneumonia will be initially categorized upon clinical diagnosis by examining  
4  
5  
6 202 pediatricians at El Instituto Nacional de Salud del Niño and further characterized as  
7  
8 203 consolidative or diffuse interstitial pneumonia given final CXR reading by blinded radiologists  
9  
10 204 from the Johns Hopkins University. Asthma will be defined by the presence of wheeze on  
11  
12 205 physical exam, history of asthma, and improvement with bronchodilators. Bronchiolitis will be  
13  
14 206 defined as the presence of wheeze and difficulty breathing on physical exam and viral symptoms  
15  
16 207 (cough, rhinorrhea), no history of asthma, and little or no improvement with bronchodilators if  
17  
18 208 attempted. URI will be defined as respiration rate less than 50 breaths per minute and associated  
19  
20 209 with one or more of the following: clear nasal secretions, sore or red throat, or hoarseness.  
21  
22  
23  
24  
25  
26

### 27 211 **Sample size**

28  
29 212 Our recruitment goal is 600 subjects, 100 each with consolidative pneumonia, diffuse interstitial  
30  
31 213 pneumonia, asthma, bronchiolitis, URI, and normal lungs. Sample size was powered to improve  
32  
33 214 specificity of the WHO algorithm upon the addition of electronic auscultation. To detect an  
34  
35 215 improvement in diagnostic specificity from 50% (WHO algorithm for pediatric pneumonia) to  
36  
37 216 80% (CLSA and WHO algorithm) with 95% power and  $\alpha$  of 0.05 between pneumonia and non-  
38  
39 217 pneumonia cases, we require 70 patients per group in the training set. We will also recruit a test  
40  
41 218 set consisting of an additional 30 patients per group (30% of total sample) to estimate areas  
42  
43 219 under the curve for our diagnostic algorithm. Each group will be over-enrolled by twenty to  
44  
45 220 account for post-consent ineligibility, for a total of 720.  
46  
47  
48  
49  
50

51 221

### 52 222 **Study organization**

1  
2  
3 223 A.B. PRISMA in Lima, Peru, and Johns Hopkins University in Baltimore, USA, will provide  
4  
5 224 administrative oversight for the study. There will be a research coordinator at a central location  
6  
7  
8 225 in Lima, Peru, who will provide logistical support and management of the study team. Instituto  
9  
10 226 Nacional de Salud del Niño will provide a team of study nurses and physicians to carry out  
11  
12 227 recruitment, physical examination, and collection of specimens. We have also established prior  
13  
14 228 training by an experienced ultrasonographer to conduct chest ultrasonography. A  
15  
16 229 multidisciplinary team of clinicians, field epidemiologists, acoustical engineers, and  
17  
18 230 biostatisticians from Johns Hopkins University, Tufts University, Cincinnati Children's Hospital,  
19  
20 231 and Instituto Nacional de Salud del Niño will be involved with study design and conduct,  
21  
22 232 statistical analysis, and reporting of results.  
23  
24  
25  
26  
27  
28

### 29 234 **Questionnaire**

30  
31 235 We will ask the parent or guardian about the child's past medical history, environmental  
32  
33 236 exposures, access to healthcare, and current respiratory symptoms. We will inquire about  
34  
35 237 demographic information, nutrition, and vaccination history. We will ask about co-morbidities,  
36  
37 238 family history, and developmental history. Environmental questions pertained to housing,  
38  
39 239 number of children, rural versus urban living, parent occupations, smoke and allergen exposure,  
40  
41 240 and sick contacts. Current respiratory symptoms were asked of the parent or guardian to answer  
42  
43 241 subjectively and included rapid breathing, difficulty breathing, chest indrawing, cyanosis, cough,  
44  
45 242 sputum production, audible breath sounds, and subjective fever.  
46  
47  
48  
49  
50  
51  
52

### 53 244 **Physical exam and laboratory testing**

54  
55  
56  
57  
58  
59  
60

1  
2  
3 245 The initial set of vital signs will be recorded, including pulse oximetry. During the physical  
4  
5  
6 246 exam, a single examining physician from the larger group of study physicians will be responsible  
7  
8 247 for recording findings for a given patient with emphasis on the respiratory exam. Chest  
9  
10 248 retractions, nasal flaring, grunting, stridor, and accessory muscle use will be noted and  
11  
12 249 characterized if present, along with any adventitious lung sounds appreciated by physician and  
13  
14  
15 250 study team member on chest auscultation. Degree of improvement after bronchodilators will also  
16  
17 251 be recorded if administered. Additionally, signs of dehydration and malnutrition will be reported  
18  
19  
20 252 if present. Laboratory results will be recorded if evaluated by the ED and include complete blood  
21  
22 253 count, electrolytes, and arterial blood gas.  
23  
24  
25 254

### 26 27 255 **Electronic Auscultation**

28  
29 256 Parents will be allowed to position the patient supine or upright. The study team member will  
30  
31 257 listen to eight auscultation sites using a ThinkLabs ds32a Digital Stethoscope and mp3 recorder,  
32  
33  
34 258 for 10 seconds at each site, in the following order of placement: front top left and right,  
35  
36 259 fronterolateral bottom right and left, back top right and left, and back bottom left and right  
37  
38  
39 260 (Figure 1). Auscultation will be performed at the participant's normal breathing patterns during  
40  
41 261 recording without being asked to take deep breaths. We will allow only one repeat of  
42  
43 262 auscultation if recording is interrupted for any reason or due to unacceptable signal quality of the  
44  
45 263 first recording.  
46  
47  
48 264

### 49 50 265 **Lung ultrasound**

51  
52  
53 266 All participants will receive bilateral lung ultrasonography carried out on SonoSite portable  
54  
55 267 ultrasound machine with HFL38/13-6MHz and P17/5-1MHz MicroMaxx® transducers by a  
56  
57  
58  
59  
60



1  
2  
3 268 single ultrasound technician who has been trained to the standardized protocol. Patients will be  
4  
5  
6 269 examined in the supine position with each hemithorax divided into six sections: 2 anterior, 2  
7  
8 270 lateral, and 2 posterior. The posterior area is defined from the posterior axillary line to the  
9  
10  
11 271 paravertebral line. Longitudinal and oblique scans will be obtained at each of the chest zones.  
12  
13 272 Longitudinal scans allow visualization of the ribs with the pleural line under them[23].  
14  
15 273 Representative images from each section will be saved and later transferred to radiologists at an  
16  
17 274 outside institution.

19  
20 275 To assess for pneumonia, 2 of 3 radiologists must agree on the description of ultrasound  
21  
22 276 images compatible with pneumonia. Consolidation will be determined by 1) the presence of  
23  
24 277 hypo- or anechoic images with loss of distinct pleural lines and 2) an irregular shredded border  
25  
26  
27 278 of the pleural line that is distinct from the lung line, termed the “shred sign.” Additional signs to  
28  
29 279 be reported will include punctate hyperechoic images reflecting air bronchograms, decreased  
30  
31  
32 280 lung sliding, and homogenous, hypoechoic images in the pleural space corresponding to pleural  
33  
34 281 effusions. Interstitial infiltrates will be determined by the presence of “lung rockets,” which  
35  
36 282 correlate to three or more B-lines in a longitudinal view between two ribs. Additional features to  
37  
38  
39 283 be reported include heterogenous echotexture, air and fluid bronchograms, lung pulse, and  
40  
41 284 additional B-lines [23].  
42

285

### 286 **Chest radiography**

47  
48 287 All case participants will undergo chest radiography. We will attempt postero-anterior and lateral  
49  
50 288 films but will allow an antero-posterior view if not possible. Digital images will be sent to a third  
51  
52  
53 289 party reading group blinded to clinical information. Using the WHO standardization of CXR  
54  
55 290 interpretation for pediatric pneumonia [24], radiologists will comment on quality as adequate,  
56  
57  
58  
59  
60

1  
2  
3 291 suboptimal, or unreadable and on the presence of pathology as consolidative or interstitial with  
4  
5  
6 292 or without pleural effusions. Radiographic evidence of pneumonia will be confirmed by  
7  
8 293 agreement by 2 out of 3 radiologist reports for a given patient. Additional pathologic findings not  
9  
10 294 previously characterized will also be recorded and reported to the patient's physician for further  
11  
12 295 intervention if necessary.  
13

14 296

### 17 297 **Microbiological studies**

19  
20 298 Blood, urine, and nasopharyngeal samples will be collected according to our study design  
21  
22 299 (Figure 2). Blood samples will be drawn for cultures and sensitivities. Urine will be tested for  
23  
24 300 detection of pneumococcal antigen and stored for PCR. Nasopharyngeal swabs will be tested for  
25  
26 301 respiratory viruses, along with culture and sensitivities. Respiratory pathogens tested by PCR  
27  
28 302 will include *Streptococcus pneumoniae*, *Haemophilus influenzae*, and respiratory syncytial virus.  
29  
30  
31

32 303

### 34 304 **Safety**

35  
36 305 To ensure safety, the researcher collecting data is experienced with providing care to children.  
37  
38 306 The researcher will use this experience to minimize any discomfort the children may have. All  
39  
40 307 blood samples will be collected by a skilled nurse or phlebotomist.  
41  
42

43 308 We will adhere to hospital procedures for avoiding hospital acquired infections. We will  
44  
45 309 wash hands with soap and water or alcohol-based hand sanitizer before patient contact. We will  
46  
47 310 wear gloves, gowns and mask when required. We will clean the devices using alcohol swabs  
48  
49 311 before and after each use.  
50

51 312

### 55 313 **Data quality and management**

1  
2  
3 314 Prior to data collection, a Manual of Operations will be developed to ensure standardization and  
4  
5 315 reliability and contain detailed instructions for all study procedures and guidelines for data  
6  
7  
8 316 collection. The manual will be revised as needed and distributed to members of the study team.  
9

10 317 All data are recorded first on paper case report forms and subsequently double-entered  
11  
12 318 using Microsoft ACCESS. Data sets will be cross-validated and errors corrected. Electronic lung  
13  
14 319 recordings will be transferred from the mp3 player to participant-specific files on the study  
15  
16 320 computer at least every other day and backed-up weekly. Digital CXR images will also be  
17  
18 321 uploaded to these files and backed-up similarly.  
19  
20  
21

22 322

### 23 24 323 **Analysis of lung sounds and statistics**

25  
26  
27 324 An important first step in CLSA is using common signal processing techniques to investigate  
28  
29 325 high and low frequency information using methods such as the Short-time Fourier Transform  
30  
31 326 (STFT), wavelet transforms, and P-spline bases. The second step will be extracting signal  
32  
33 327 processing features to train the classifier.  
34  
35

36 328 Based on preliminary recordings to date performed by our group in Baltimore (Figure 3),  
37  
38 329 we anticipate that wheeze can be characterized using features from the Fourier transform, such as  
39  
40 330 the existence and temporal stability of tonal peaks in the 300-1000 Hz range, while crackles  
41  
42 331 could be recognized using features such as amplitude, the presence of broad-band energy and the  
43  
44 332 duration of this energy. Features such as the decrease in signal energy with frequency can  
45  
46 333 characterize movement sounds. We have previously used time-frequency descriptors such as  
47  
48 334 Mel-frequency cepstral coefficients as features and anticipate they will be useful for CLSA but  
49  
50 335 may require temporal information as well. We will use the extracted features from signal  
51  
52 336 processing analyses for classification using machine learning algorithms including: nearest  
53  
54  
55  
56  
57  
58  
59  
60

1  
2  
3 337 neighbor methods, support vector machines, random forests, and gradient boosting. Primary  
4  
5 338 analysis will consist of a five-fold cross validation on the training set to calculate expected  
6  
7  
8 339 prediction errors. The training set will additionally be used to estimate areas under the curve for  
9  
10 340 our diagnostic algorithm, including CLSA, WHO algorithm, imaging, and physical exam  
11  
12 341 findings. Secondary analysis will include calculating sensitivities and specificities of  
13  
14 342 experimental diagnostic US for detection of pneumonia when compared to gold standards  
15  
16  
17 343 (clinical diagnosis and CXR reading). Performance will be measured using logistic and  
18  
19 344 multinomial regression, receiver operating characteristic curves, and area under the curve.  
20  
21  
22 345

## 23 24 346 **ETHICS AND DISSEMINATION**

25  
26  
27 347 Approval was obtained from the Ethics Committees of A.B. PRISMA in Lima, Peru, El Instituto  
28  
29 348 Nacional de Salud del Niño in Lima, Peru, and the Johns Hopkins University School of Medicine  
30  
31 349 in Baltimore, MD. Written informed consent will be obtained from a parent or guardian. Any  
32  
33 350 clinical information gained from participation in this study that could possibly change  
34  
35 351 management will be given to the child's physician for his/her discretion. All data and sensitive  
36  
37 352 information will be protected by being kept on encrypted devices or accessible only to study  
38  
39 353 members.  
40  
41  
42

43 354 Plans for dissemination include final publication following completion of the study  
44  
45 355 following the STARD guidelines for reporting diagnostic accuracy[25]. We aim to develop a free  
46  
47 356 online library of lung sounds for further enhancement of CLSA and the machine learning  
48  
49 357 algorithm, as well as for future research and clinical education.  
50  
51

52  
53 358 Funders have had no role in study design, nor will they have a role in the collection,  
54  
55 359 management, analysis, and interpretation of data; manuscript preparation; and future  
56  
57  
58  
59  
60

1  
2  
3  
4  
5  
6  
7  
8  
9  
10  
11  
12  
13  
14  
15  
16  
17  
18  
19  
20  
21  
22  
23  
24  
25  
26  
27  
28  
29  
30  
31  
32  
33  
34  
35  
36  
37  
38  
39  
40  
41  
42  
43  
44  
45  
46  
47  
48  
49  
50  
51  
52  
53  
54  
55  
56  
57  
58  
59  
60

360 publications. The principal investigator will have ultimate authority over these aspects of  
361 research.

For peer review only

1  
2  
3 362 **DISCUSSION**  
4

5 363 This study aims to investigate alternatives to improve the specificity of the WHO algorithm for  
6  
7  
8 364 pediatric pneumonia, namely electronic auscultation and chest ultrasonography. Utilizing  
9  
10 365 electronic auscultation, we intend to characterize and analyze lung sounds associated with  
11  
12 366 consolidative pneumonia, diffuse interstitial pneumonia, bronchiolitis, asthma, and upper  
13  
14 367 respiratory infections, to determine if these diagnoses can be differentiated from normal through  
15  
16 368 automated lung sounds, and to compare with chest ultrasound, WHO algorithm, and molecular  
17  
18 369 testing for etiology. By reporting a protocol for CLSA, we hope to encourage standardization and  
19  
20  
21  
22 370 expansion of recorded lung sounds via an online library for continued enhancement of machine  
23  
24 371 learning as well as for continued scientific research and clinical education.  
25  
26

27 372 We foresee our greatest challenge in maximizing the quality of recorded lung sounds. To  
28  
29 373 begin the study, we will utilize a commercial electronic stethoscope for recordings, which is  
30  
31 374 identical in design to standard clinical stethoscopes. However, through sound processing using  
32  
33 375 time-frequency analysis methods such as the Short-time Fourier Transform (STFT) and  
34  
35 376 Continuous Wavelet Transforms (CWT), we hope to enhance the signal-to-noise ratio for data  
36  
37 377 analysis and characterization. By examining additional features such as amplitude, we may also  
38  
39 378 be better able to identify crackles and consolidation. We also plan to test alternative recording  
40  
41 379 devices using piezoelectric microphones covered with a thin polymer that may be able to better  
42  
43 380 capture lung sounds. Based on our recordings to date, we anticipate that wheeze can be  
44  
45 381 differentiated from normal breath using features such as the existence and temporal stability of  
46  
47 382 tonal peaks in the 300-1000 Hz range, while crackle should be recognizable using features such  
48  
49 383 as the presence of broad-band energy and the duration of this energy. Features such as the  
50  
51 384 decrease in signal energy with frequency can characterize movement sounds. We have  
52  
53  
54  
55  
56  
57  
58  
59  
60

1  
2  
3 385 previously used time-frequency descriptors borrowed from speech processing (Mel-frequency  
4  
5  
6 386 cepstral coefficients and their time derivatives) and cough-specific time-domain features such as  
7  
8 387 signal rise time and event duration and anticipate they will be useful for CLSA. We will use the  
9  
10 388 extracted features from signal processing analyses for classification using machine learning  
11  
12  
13 389 algorithms such as nearest neighbor methods, support vector machines, or random forests.

14  
15 390 The largest challenge in regards to lung ultrasound will likely be obtaining adequate  
16  
17 391 quality of images and inter-user variability. To reduce variability, the study technician will be  
18  
19  
20 392 trained to systematically scan each subdivided hemithorax for pathologic findings described  
21  
22 393 previously [9,23], and if possible, we will attempt lung ultrasound twice for each patient.  
23  
24 394 Ultrasound also takes substantially longer compared to chest radiography because all areas must  
25  
26  
27 395 be adequately explored; therefore, it may be difficult for a child to be cooperative for that length  
28  
29 396 of time. Through our large sample size and detailed methods, we aim to improve standardization  
30  
31 397 of pediatric chest ultrasound and further define pathologic findings associated with disease,  
32  
33  
34 398 which may also lead to more efficient and faster scanning.

35  
36 399 Limitations to this study center mostly on our case definitions for clinical diagnoses. As  
37  
38  
39 400 mentioned previously, there are no precise gold standards and as with many pediatric diseases,  
40  
41 401 diagnosis is clinical. As such, our end points are determined by clinical exam findings by single  
42  
43 402 examining physicians with additional confirmation via radiology for pneumonia cases only. We  
44  
45  
46 403 acknowledge the variability of observed findings among physicians but also accept that this is  
47  
48 404 the mechanism of diagnosis in most clinical settings.

49  
50 405 The WHO algorithm for case management of pediatric pneumonia lacks diagnostic  
51  
52  
53 406 specificity. While clinical information such as elevated heart rate and decreased oxygen  
54  
55 407 saturation may aid in degree of illness and monitoring, these data also lack specificity required to  
56  
57  
58  
59  
60

1  
2  
3 408 drastically improve case management. Lung ultrasound is also a promising tool and offers  
4  
5  
6 409 portability that is not available for radiography. Ultrasound has the added benefit of pleural  
7  
8 410 effusion detection, which may prove an important adjunct to the electronic auscultation  
9  
10 411 algorithm. However, cost and availability of skilled technicians may greatly hamper its utility in  
11  
12 412 resource-poor settings, similar to microbiologic testing. Electronic auscultation is a simple,  
13  
14 413 inexpensive tool that could have great diagnostic impact on ALRI in children worldwide.  
15  
16  
17 414 Through further research, we foresee utilizing this tool with pre-programmed computerized  
18  
19  
20 415 analysis to improve case management in developing countries.  
21  
22 416



1  
2  
3  
4  
5  
6  
7  
8  
9  
10  
11  
12  
13  
14  
15  
16  
17  
18  
19  
20  
21  
22  
23  
24  
25  
26  
27  
28  
29  
30  
31  
32  
33  
34  
35  
36  
37  
38  
39  
40  
41  
42  
43  
44  
45  
46  
47  
48  
49  
50  
51  
52  
53  
54  
55  
56  
57  
58  
59  
60

417 **COMPETING INTERESTS**

418 All authors in the study report no competing interests.

419

For peer review only

1  
2  
3 420 **AUTHORS' CONTRIBUTIONS**  
4

5  
6 421 All authors were involved in the study design and writing of the manuscript, and all reviewed the  
7  
8 422 final manuscript before submission. Laura Ellington directly contributed to study design, and is  
9  
10 423 responsible for supervision of data gathering at the children's hospital in Lima, electronic  
11  
12 424 auscultation and chest ultrasound recordings, data management, analysis, and writing of this  
13  
14 425 manuscript. Robert Gilman provided mentorship to Laura Ellington and technical support for the  
15  
16 426 study. James Tielsch and Mark Steinhoff contributed to the concept and study design. Dante  
17  
18 427 Figueroa will serve as study physician, provide supervision and administrative oversight on site,  
19  
20 428 and perform physical testing. Shalim Rodriguez contributed to study design and was responsible  
21  
22 429 for developing and training the study technician to a standardized chest ultrasound protocol.  
23  
24 430 Brian Caffo contributed to study design and will contribute to statistical analysis. Brian Tracey,  
25  
26 431 Mounya Elhilali, and James West contributed to study design and will contribute significantly to  
27  
28 432 signal processing and data analysis. William Checkley had ultimate oversight over study design  
29  
30 433 and administration, and was equally responsible writing of the manuscript, and serves as mentor  
31  
32 434 to Laura Ellington throughout the conduct of the study.  
33  
34  
35  
36  
37  
38  
39  
40  
41  
42  
43  
44  
45  
46  
47  
48  
49  
50  
51  
52  
53  
54  
55  
56  
57  
58  
59  
60

435 **REFERENCES**

- 436 1 Sazawal S, Black RE. Effect of pneumonia case management on mortality in neonates,  
437 infants, and preschool children: a meta-analysis of community-based trials. *The Lancet*  
438 *Infectious Diseases* 2003;**3**:547–56.
- 439 2 Cardoso M-R a, Nascimento-Carvalho CM, Ferrero F, *et al.* Adding fever to WHO criteria  
440 for diagnosing pneumonia enhances the ability to identify pneumonia cases among  
441 wheezing children. *Archives of disease in childhood* 2011;**96**:58–61.
- 442 3 Puumalainen T, Quiambao B, Abucejo-Ladesma E, *et al.* Clinical case review: a method  
443 to improve identification of true clinical and radiographic pneumonia in children meeting  
444 the World Health Organization definition for pneumonia. *BMC infectious diseases*  
445 2008;**8**:95.
- 446 4 Hazir T, Nisar YB, Qazi S a, *et al.* Chest radiography in children aged 2-59 months  
447 diagnosed with non-severe pneumonia as defined by World Health Organization:  
448 descriptive multicentre study in Pakistan. *BMJ (Clinical research ed)* 2006;**333**:629.
- 449 5 Hazir T, Nisar YB, Abbasi S, *et al.* Comparison of oral amoxicillin with placebo for the  
450 treatment of world health organization-defined nonsevere pneumonia in children aged 2-  
451 59 months: a multicenter, double-blind, randomized, placebo-controlled trial in Pakistan.  
452 *Clinical infectious diseases: an official publication of the Infectious Diseases Society of*  
453 *America* 2011;**52**:293–300.
- 454 6 Madico G, Gilman RH, Jabra A, *et al.* The role of pulse oximetry: its use as an indicator  
455 of severe respiratory disease in Peruvian children living at sea level. *Archives of*  
456 *Pediatrics and Adolescent Medicine* 1995;**149**:1259.

- 1  
2  
3 457 7 Schult S, Canelo-Aybar C. Oxygen saturation in healthy children aged 5 to 16 years  
4  
5  
6 458 residing in Huayllay, Peru at 4340 m. *High altitude medicine & biology* 2011;**12**:89–92.  
7  
8 459 8 Iuri D, De Candia a, Bazzocchi M. Evaluation of the lung in children with suspected  
9  
10 460 pneumonia: usefulness of ultrasonography. *La Radiologia medica* 2009;**114**:321–30.  
11  
12 461 9 Parlamento S, Copetti R, Di S. Evaluation of lung ultrasound for the diagnosis of  
13  
14 462 pneumonia in the ED. *European Respiratory Journal* 2009:379–84.  
15  
16 463 10 Yang PC, Luh KT, Chang DB, Yu CJ, Kuo SH WH. Ultrasonographic Evaluation of  
17  
18 464 Pulmonary Consolidation. *American Review of Respiratory disease* 1992;**146**:757–62.  
19  
20 465 11 Su YH, Wang M, Block TM, *et al.* Transrenal DNA as a diagnostic tool: Important  
21  
22 466 technical notes. *Annals of the New York Academy of Sciences* 2004;**1022**:81–9.  
23  
24 467 12 Gehmacher o, Mathis G, Kopf A, *et al.* Ultrasound imaging of pneumonia. *Ultrasound in*  
25  
26 468 *med & biol* 1995;**21**:1119–22.  
27  
28 469 13 Lichtenstein D, Lascols N, Mezière G, *et al.* Ultrasound diagnosis of alveolar  
29  
30 470 consolidation in the critically ill. *Intensive care medicine* 2004;**30**:276–81.  
31  
32 471 14 Murphy R, Vyshedskiy A, Charnitsky V, *et al.* Automated lung sound analysis in patients  
33  
34 472 with pneumonia. *Respiratory Care* 2004;**49**:1490–07.  
35  
36 473 15 Grenier M, Gagnon K, Genest J, *et al.* Clinical comparison of acoustic and electronic  
37  
38 474 stethoscopes and design of a new electronic stethoscope. *American Journal of Cardiology*  
39  
40 475 1998;**81**:653–6.  
41  
42 476 16 Gurung A, Scrafford C, Tielsch J, *et al.* Computerized lung sound analysis as a diagnostic  
43  
44 477 aid for the detection of abnormal lung sounds: A systematic review and meta-analysis.  
45  
46 478 *Respiratory Medicine* 2011;**doi:10.101**.

- 1  
2  
3 479 17 Abaza A a, Day JB, Reynolds JS, *et al.* Classification of voluntary cough sound and  
4  
5  
6 480 airflow patterns for detecting abnormal pulmonary function. *Cough (London, England)*  
7  
8 481 2009;**5**:8.  
9  
10 482 18 Reichert S, Gass R, Brandt C, *et al.* Analysis of respiratory sounds: state of the art.  
11  
12 483 *Clinical medicine Circulatory, respiratory and pulmonary medicine* 2008;**2**:45–58.  
13  
14  
15 484 19 Lu X, Bahoura M. An integrated automated system for crackles extraction and  
16  
17 485 classification. *Biomedical Signal Processing and Control* 2008;**3**:244–54.  
18  
19  
20 486 20 Marshall A, Boussakta S. Signal analysis of medical acoustics sounds with applications to  
21  
22 487 chest medicine. *J Franklin Institute* 2007;**344**:230–42.  
23  
24  
25 488 21 Taplidou S, Hadjileontiadis L, Kitsas I, *et al.* On applying continuous wavelet transform  
26  
27 489 in wheeze analysis. *IEEE EMBS* 2004;:3832–5.  
28  
29  
30 490 22 Saeed S, Body R. Auscultating to diagnose pneumonia. *EMJ* 2007;**24**:294–6.  
31  
32 491 23 Volpicelli G, Silva F, Radeos M. Real-time lung ultrasound for the diagnosis of alveolar  
33  
34 492 consolidation and interstitial syndrome in the emergency department. *European Journal of*  
35  
36 493 *Emergency Medicine* 2010;**17**:63–72.  
37  
38  
39 494 24 Standardization of interpretation of chest radiographs for the diagnosis of pneumonia in  
40  
41 495 children World Health Organization Pneumonia Vaccine Trial Investigators ' Group  
42  
43 496 DEPARTMENT OF VACCINES. *World Health* 2001.  
44  
45  
46 497 25 Bossuyt PM, Reitsma JB, Bruns DE, *et al.* Towards complete and accurate reporting of  
47  
48 498 studies of diagnostic accuracy: the STARD initiative. *BMJ (Clinical research ed)*  
49  
50 499 2003;**326**:41–4.  
51  
52  
53 500  
54  
55  
56  
57  
58  
59  
60

1  
2  
3 501 **Figure 1. Order of auscultation by electronic stethoscope.** The study team member will listen  
4  
5  
6 502 to each site, starting with “A” for 10 seconds each.  
7

8 503

9  
10 504 **Figure 2. Microbiology testing schematic.**  
11

12 505

13  
14  
15 506 **Figure 3. Preliminary data suggest a difference in spectral analysis between children with**  
16  
17 507 **and without wheeze.** Short-time FFT analysis was utilized to visualize spectrograms of a normal  
18  
19  
20 508 control (A) and asthmatic child with active wheeze (B). Representative sample is from  
21  
22 509 preliminary recordings taken from the Emergency Room at the Johns Hopkins Hospital in  
23  
24 510 Baltimore, MD.  
25

26  
27 511  
28  
29  
30  
31  
32  
33  
34  
35  
36  
37  
38  
39  
40  
41  
42  
43  
44  
45  
46  
47  
48  
49  
50  
51  
52  
53  
54  
55  
56  
57  
58  
59  
60

1  
2  
3  
4 1 **Computerized lung sound analysis to improve the specificity of pediatric pneumonia**  
5  
6 2 **diagnosis in resource-poor settings: [Protocol and methods for an observational A-case-](#)**  
7  
8 3 **~~control~~ study**  
9  
10 4

11  
12 5 Laura E Ellington (1), Robert H Gilman (2, 3), James M Tielsch (2), Mark Steinhoff (2, 4),  
13 6 Dante Figueroa (5), Shalim Rodriguez (6), Brian Caffo (7), Brian Tracey (8), Mounya Elhilali  
14 7 (9), James West (9), William Checkley (1).  
15  
16  
17  
18  
19

- 20 8  
21  
22 9 1. Division of Pulmonary and Critical Care, Johns Hopkins University, Baltimore, USA.  
23  
24 10 2. Program in Global Disease Epidemiology and Control, Johns Hopkins University, Baltimore,  
25 11 USA.  
26  
27  
28 12 3. Asociación Benéfica PRISMA, Lima, Peru.  
29  
30  
31 13 4. Global Health Center, Cincinnati Children's Hospital, Cincinnati, USA.  
32  
33  
34 14 5. Instituto Nacional de Salud del Niño, Lima, Peru.  
35  
36 15 6. Unidad de Cuidados Intensivos, Hospital Nacional Rebagliati, Lima, Peru.  
37  
38 16 7. Department of Biostatistics, Johns Hopkins University, Baltimore, USA.  
39  
40 17 8. Department of Electrical and Computer Engineering, Tufts University, Boston, USA.  
41  
42 18 9. Department of Electrical and Computer Engineering, Johns Hopkins University, Baltimore,  
43 19 USA.  
44  
45  
46  
47  
48  
49  
50  
51  
52  
53  
54  
55  
56  
57  
58  
59  
60

1  
2  
3 21 **Corresponding author:**  
4

5 22 William Checkley, MD, PhD  
6

7 23 The Johns Hopkins University  
8

9 24 Division of Pulmonary and Critical Care  
10

11 25 1830 Monument St, Fifth Floor  
12

13 26 Baltimore, MD 21205  
14

15 27 Telephone: 443-287-8741  
16  
17  
18  
19  
20  
21  
22  
23  
24  
25  
26

29 **Word count:** ~~3,860~~3,887.  
30  
31  
32  
33

31 **Keywords:** Electronic auscultation; sensitivity and specificity; pneumonia; diagnosis  
32  
33

32 [subheading]; child  
33  
34  
35  
36  
37  
38  
39  
40  
41  
42  
43  
44  
45  
46  
47  
48  
49  
50  
51  
52  
53  
54  
55  
56  
57  
58  
59  
60

34 **Funding sources:** Funding for this study and support for Laura Ellington was provided by the  
35  
36

35 Doris Duke Charitable Foundation Clinical Research Fellowship (~~no grant number~~).  
36  
37  
38  
39  
40  
41  
42  
43  
44  
45  
46  
47  
48  
49  
50  
51  
52  
53  
54  
55  
56  
57  
58  
59  
60

37 **Acknowledgements:** Additional support came from A.B. PRISMA, Instituto Nacional de Salud  
42  
43  
44  
45  
46  
47  
48  
49  
50  
51  
52  
53  
54  
55  
56  
57  
58  
59  
60

38 del Niño, and collaborators at JHU, Tufts University, Cincinnati Children's Hospital, and  
43  
44  
45  
46  
47  
48  
49  
50  
51  
52  
53  
54  
55  
56  
57  
58  
59  
60

39 Hospital Nacional Rebagliati. Thinklabs Medical (Centennial, CO) generously provided us with  
44  
45  
46  
47  
48  
49  
50  
51  
52  
53  
54  
55  
56  
57  
58  
59  
60

40 an electronic stethoscope, at discount.  
45  
46  
47  
48  
49  
50  
51  
52  
53  
54  
55  
56  
57  
58  
59  
60



1  
2  
3 42 **ARTICLE FOCUS**  
4

- 5  
6 43 • We seek to characterize lung sounds associated with different respiratory illnesses in  
7  
8 44 children using electronic auscultation and determine whether these sounds can be  
9  
10 45 differentiated from normal through computerized lung sound analysis.  
11  
12 46 • We summarize the study design and methods with standardized protocols for electronic  
13  
14 47 auscultation and chest ultrasound in children.  
15  
16  
17  
18  
19

20 49 **KEY MESSAGES**  
21

- 22 50 • We aim to develop a protocol for increased specificity of pediatric pneumonia diagnosis  
23  
24 51 in developing countries.  
25  
26  
27  
28  
29

30 53 **STRENGTHS AND LIMITATIONS**  
31

- 32 54 • Our study is limited by the case definitions available. With no gold standard for many  
33  
34 55 pediatric respiratory diseases, we will rely on clinical exam findings and chest  
35  
36 56 radiography.  
37  
38 57 • By investigating a number of novel and commonly used diagnostic tools for a variety of  
39  
40 58 respiratory diseases in children, we will gain valuable information regarding the  
41  
42 59 diagnostic potential of each, with a main focus on the electronic stethoscope.  
43  
44  
45  
46  
47  
48  
49  
50  
51  
52  
53  
54  
55  
56  
57  
58  
59  
60

**ABSTRACT**

**Introduction:** The World Health Organization (WHO) case management algorithm for pediatric pneumonia relies solely on symptoms of shortness of breath or cough and tachypnea for treatment and has poor diagnostic specificity, tends to increase antibiotic resistance. Alternatives, including oxygen saturation measurement, chest ultrasound, and chest auscultation exist but with potential disadvantages. Electronic auscultation has potential for improved detection of pediatric pneumonia but has yet to be standardized. We aim to investigate the use of electronic auscultation to improve the specificity of the current WHO algorithm in developing countries.

**Methods:** Our study is designed to test the hypothesis that pulmonary pathology can be differentiated from normal using computerized lung sound analysis (CLSA). We will record lung sounds from 600 children aged  $\leq 5$  years, 100 each with consolidative pneumonia, diffuse interstitial pneumonia, asthma, bronchiolitis, upper respiratory infections, and normal lungs at a children's hospital in Lima, Peru. We will compare CLSA with the WHO algorithm and other detection approaches, including physical exam findings, chest ultrasound, and microbiologic testing to construct an improved algorithm for pneumonia diagnosis.

**Ethics and dissemination:** Approval was obtained from the Ethics Committees of A.B. PRISMA, Instituto Nacional de Salud del Niño and Johns Hopkins School of Medicine. Dissemination will include publications following the study and the development of a free online library of lung sounds for improvement of CLSA, future research, and clinical education.

**Discussion:** This study will develop standardized methods for electronic auscultation, and chest ultrasound, and compare their utility for detection of pneumonia to standard approaches. Utilizing signal processing techniques, we aim to characterize lung sounds and through machine learning, develop a classification system to distinguish pathologic sounds. Data will allow a

1  
2  
3  
4  
5  
6  
7  
8  
9  
10  
11  
12  
13  
14  
15  
16  
17  
18  
19  
20  
21  
22  
23  
24  
25  
26  
27  
28  
29  
30  
31  
32  
33  
34  
35  
36  
37  
38  
39  
40  
41  
42  
43  
44  
45  
46  
47  
48  
49  
50  
51  
52  
53  
54  
55  
56  
57  
58  
59  
60

83 better understanding of the benefits and limitations of novel diagnostic techniques in pediatric  
84 pneumonia.

For peer review only

## 85 INTRODUCTION

86 Acute lower respiratory infection (ALRI) is the leading cause of death in children under 5 years  
 87 of age. Pneumonia alone is responsible for killing 1.6 million children worldwide. The World  
 88 Health Organization (WHO) developed a case management algorithm that relies solely on  
 89 symptoms of shortness of breath or cough, an elevated respiratory rate, and chest indrawing for  
 90 the diagnosis of pneumonia and administration of antibiotics and/or referral in resource-poor  
 91 areas (Table 1). Where successfully implemented, this algorithm has resulted in a 30-40%  
 92 reduction in case mortality[1] but has

93 moderate sensitivity and poor specificity,  
 94 ranging from 16% for children presenting  
 95 with wheeze[2] and 49% for nonsevere  
 96 pneumonia to 95% for very severe  
 97 pneumonia[3]. Hazir and colleagues  
 98 demonstrated that over 80% of children  
 99 with WHO-defined non-severe pneumonia  
 100 had normal chest radiographs (CXR)[4]

**Table 1. WHO Classification of ALRI in Children Presenting with Cough and/or Difficult Breathing**

|                                      |                                                                                                                                   |
|--------------------------------------|-----------------------------------------------------------------------------------------------------------------------------------|
| <b>No pneumonia (cough and cold)</b> | Respiratory rate, breaths/minute<br><50 (infants 2–11 months)<br><40 (children 12–59 months)<br>No lower chest indrawing          |
| <b>Non-severe pneumonia</b>          | Respiratory rate, breaths/minute<br>>50 (infants 2–11 months)<br>>40 (children 12–59 months)<br>No lower chest indrawing          |
| <b>Severe pneumonia</b>              | Lower chest indrawing ± rapid breathing                                                                                           |
| <b>Very severe pneumonia</b>         | At least one of the following:<br>Unable to feed<br>Convulsions<br>Lethargic<br>Stridor at rest<br>Clinically severe malnutrition |

101 and that the resulting case management was equivalent to no treatment in a randomized clinical  
 102 trial[5], only further increasing concern for global antibiotic resistance.

103 Pneumonia is a pathological process resulting in fluid-filled alveoli, and while there are  
 104 multiple potential etiologies, most are infectious. Currently, there is no gold standard for  
 105 detection of bacterial pneumonia requiring treatment. In areas where resources are readily  
 106 available, chest radiography and clinical diagnosis serve as the standard of care for pneumonia  
 107 detection but these are not available in resource-poor settings around the world. Potential

1  
2  
3 108 alternatives exist within aspects of the physical exam and imaging. Supplementing oxygen  
4  
5 109 saturation measurements with the current WHO algorithm has been shown to increase  
6  
7  
8 110 specificity[6]; however, the normal range in healthy children varies with environmental factors  
9  
10 111 like altitude[7]. Another promising alternative for detection of pediatric pneumonia is lung  
11  
12 112 ultrasound. Ultrasound has the advantage of gathering information from multiple angles and the  
13  
14 113 ability to detect air-fluid differences that are present with pneumonia. Studies suggest that this  
15  
16 114 technique may be more sensitive than radiography and has the added benefit of lack of radiation;  
17  
18 115 however, these studies have all lacked power due to small sample size[8-13]. Cost and  
19  
20 116 availability of skilled ultrasound technicians may limit use in resource-poor settings. Chest  
21  
22 117 auscultation is a valuable tool for detection of respiratory pathology and is used widely in  
23  
24 118 clinical practice. However, limitations include inter-listener variability, subjectivity in the  
25  
26 119 interpretation of lung sounds[14,15], and lack of trained personnel in resource poor settings.  
27  
28 120 Electronic auscultation has the advantage of signal amplification and ambient noise reduction  
29  
30 121 leading to increased signal-to-noise ratio along with its independence on human ear sensitivity to  
31  
32 122 different acoustic frequencies. Furthermore, through computerized lung sound analysis (CLSA),  
33  
34 123 this diagnostic method results in discrete values from a final reading, thereby facilitating  
35  
36 124 standardization. With advancement in electronic stethoscopes and CLSA, there is great potential  
37  
38 125 for improved diagnosis of pediatric pneumonia where multiple diagnostic tools are not readily  
39  
40 126 available.

41  
42  
43 127 In acoustic signal processing, the two commonly studied lung sounds are crackles and  
44  
45 128 wheezes, which constitute unique temporal and frequency characteristics. Crackles have been  
46  
47 129 most commonly associated with pneumonia, whereas wheezes are often observed in patients  
48  
49 130 with asthma and bronchiolitis[16]. According to the Computerized Respiratory Sound Analysis  
50  
51  
52  
53  
54  
55  
56  
57  
58  
59  
60

1  
2  
3 131 (CORSA) Guidelines[17], the frequency of crackles is characterized in the spectrum of 200 to  
4  
5  
6 132 2000 Hz, while wheezes have a frequency spectrum of 100 to 1000 Hz. Wheezes have  
7  
8 133 continuous waveforms (>100 ms duration) with one or more tonal components and a dominant  
9  
10 134 frequency greater than 400 Hz during the expiratory phase. Crackles are short (<20ms), non-  
11  
12 135 periodic waveforms with transitory sharp peaks and broadband frequency content during mid-  
13  
14 136 inspiratory phase. Time-frequency decomposition of lung sounds provides useful information in  
15  
16 137 identifying and localizing adventitious lung sounds in a patient.  
17  
18  
19

20 138 Translating the CLSA characterization of abnormal lung sounds to clinical practice has  
21  
22 139 yet to be achieved. There are a few studies demonstrating potential, yet data is largely lacking,  
23  
24 140 especially in the field of pediatrics. Our group conducted a systematic review and meta-analysis  
25  
26 141 of studies using CLSA for the detection of a variety of respiratory disease in adults, which found  
27  
28 142 an overall sensitivity and specificity of 80% and 85%, respectively, when compared to  
29  
30 143 radiologically confirmed cases, with markedly limited results due to lack of quality and quantity  
31  
32 144 of available data, as well as lack of standardization[16,18-22].  
33  
34  
35

36 145 In this study, we seek to utilize electronic auscultation to record lung sounds of children  
37  
38 146 with various clinical diagnoses: pneumonia (diffuse interstitial and lobar), asthma, bronchiolitis,  
39  
40 147 and upper respiratory infection (URI) in a tertiary care center in Lima, Peru, and determine  
41  
42 148 whether they can be differentiated from normal lung sounds using CLSA. In addition, we aim to  
43  
44 149 compare with imaging modalities of chest radiography and ultrasound. We hypothesize that not  
45  
46 150 only will the sounds profiles of each pulmonary disease pathology differ from normal, but due to  
47  
48 151 unique characteristics of lung sounds associated with bacterial pneumonia versus asthma,  
49  
50 152 bronchiolitis or URI, CLSA may allow differentiation of various acute lower respiratory disease  
51  
52 153 processes. With this information in conjunction with additional basic clinical information (i.e.  
53  
54  
55  
56  
57  
58  
59  
60

1  
2  
3  
4  
5  
6  
7  
8  
9  
10  
11  
12  
13  
14  
15  
16  
17  
18  
19  
20  
21  
22  
23  
24  
25  
26  
27  
28  
29  
30  
31  
32  
33  
34  
35  
36  
37  
38  
39  
40  
41  
42  
43  
44  
45  
46  
47  
48  
49  
50  
51  
52  
53  
54  
55  
56  
57  
58  
59  
60

154 temperature, respiratory rate, oxygen saturation), we believe that a much needed improvement in  
155 the detection and case management of pediatric pneumonia is possible.

For peer review only

1  
2  
3 156 **METHODS**  
4

5  
6 157 **Study objectives**  
7

8 158 The primary objectives of this study are to characterize lung sounds associated with various  
9  
10 159 clinical diagnoses: radiologically confirmed consolidative pneumonia and diffuse interstitial  
11  
12 160 pneumonia, bronchiolitis, asthma, and upper respiratory infections, in a pediatric population;  
13  
14 161 and, to determine if these diagnoses can be differentiated from normal through automated lung  
15  
16 162 sounds analysis and compare with modalities of imaging, current WHO algorithm for ALRI case  
17  
18 163 management, and microbiological testing. We then aim to then develop a clinical protocol  
19  
20 164 pairing electronic auscultation with a CLSA algorithm to aid in pneumonia diagnosis.  
21  
22  
23  
24  
25

26  
27 166 **Study design**  
28

29 167 Our design will be a cross-sectional study of lung sounds and other diagnostic modalities from  
30  
31 168 children 2 to 60 months of age presenting with a primary respiratory complaint to the Instituto  
32  
33 169 Nacional de Salud del Niño, a tertiary care hospital in Lima, Peru. Informed consent from  
34  
35 170 parents will be obtained in the Emergency Department (ED), asthma ward, or pulmonary ward  
36  
37 171 where all testing will be performed in a single visit. Parents will be asked to fill out a  
38  
39 172 questionnaire while the physician reports relevant aspects of the physical exam. Electronic  
40  
41 173 auscultation will then be performed, following by imaging and collection of blood, respiratory,  
42  
43 174 urine, and stool samples.  
44  
45  
46  
47

48 175 During the initial phase, we will record lung sounds from 600 children from 2 to 59  
49  
50 176 months of age, 100 each with consolidative pneumonia, diffuse interstitial pneumonia, asthma,  
51  
52 177 bronchiolitis, upper respiratory infections, and normal lungs. The second phase will consist of  
53  
54 178 completing our testing set for external validity and comparing CLSA with the current WHO  
55  
56  
57  
58  
59  
60



1  
2  
3 179 algorithm and other diagnostic tools such as physical exam findings, chest ultrasound, and  
4  
5 180 microbiologic testing, in order to construct an improved algorithm for pneumonia diagnosis.  
6  
7  
8 181

9  
10 182 **Study population**

11  
12 183 Children from 2 to 59 months of age presenting to the ED or in the asthma or pulmonary ward  
13  
14 184 without a history of chronic lung disease, excluding asthma, or significant cardiac disease will be  
15  
16 invited to participate in the study. Children with respiratory complaints will be invited to  
17  
18 185 participate as potential cases, while those without respiratory complaints and no acute respiratory  
19  
20 186 illness within one month of presentation will be invited to join the study as controls.  
21  
22 187

23  
24 188 Children will be considered eligible if their parents or guardians are able to provide  
25  
26 189 written informed consent, and they themselves do not require airway management or non-  
27  
28 190 invasive ventilation. Children will be considered ineligible if they have chronic lung diseases  
29  
30 191 other than asthma, such as cystic fibrosis, bronchiectasis, and chronic lung disease of prematurity  
31  
32 192 or significant congenital heart disease. Patients will be considered ineligible post-consent if they  
33  
34 193 were found to have more than one active respiratory diagnosis upon further testing. Group  
35  
36 194 classification also may be modified post-consent and further enrollment required depending on  
37  
38 195 chest x-ray (CXR) final readings and microbiological testing for diagnosis.  
39  
40  
41  
42  
43  
44  
45

46 197 **Outcomes and case definitions**

47  
48 198 Because there is no gold standard for diagnosis, we aim to compare our results with common  
49  
50 199 case definitions and clinical diagnoses by experienced physicians. Secondary outcomes will  
51  
52 200 incorporate etiology information from standard culture and molecular techniques; however, these  
53  
54 201 additional data will not serve as the gold standard.  
55  
56  
57  
58  
59  
60

1  
2  
3 202 Pneumonia will be initially categorized upon clinical diagnosis by examining  
4  
5  
6 203 pediatricians at El Instituto Nacional de Salud del Niño and further characterized as  
7  
8 204 consolidative or diffuse interstitial pneumonia given final CXR reading by blinded radiologists  
9  
10 205 from the Johns Hopkins University. Asthma will be defined by the presence of wheeze on  
11  
12 206 physical exam, history of asthma, and improvement with bronchodilators. Bronchiolitis will be  
13  
14 207 defined as the presence of wheeze and difficulty breathing on physical exam and viral symptoms  
15  
16 208 (cough, rhinorrhea), no history of asthma, and little or no improvement with bronchodilators if  
17  
18 209 attempted. URI will be defined as respiration rate less than 50 breaths per minute and associated  
19  
20 210 with one or more of the following: clear nasal secretions, sore or red throat, or hoarseness.  
21  
22  
23  
24  
25  
26

### 27 212 **Sample size**

28  
29 213 Our recruitment goal is 600 subjects, 100 each with consolidative pneumonia, diffuse interstitial  
30  
31 214 pneumonia, asthma, bronchiolitis, URI, and normal lungs. Sample size was powered to improve  
32  
33 215 specificity of the WHO algorithm upon the addition of electronic auscultation. To detect an  
34  
35 216 improvement in diagnostic specificity from 50% (WHO algorithm for pediatric pneumonia) to  
36  
37 217 80% (CLSA and WHO algorithm) with 95% power and  $\alpha$  of 0.05 between pneumonia and non-  
38  
39 218 pneumonia cases, we require 70 patients per group in the training set. We will also recruit a test  
40  
41 219 set consisting of an additional 30 patients per group (30% of total sample) to estimate areas  
42  
43 220 under the curve for our diagnostic algorithm. Each group will be over-enrolled by twenty to  
44  
45 221 account for post-consent ineligibility, for a total of 720.  
46  
47  
48  
49  
50

51 222

### 52 53 223 **Study organization**

1  
2  
3 224 A.B. PRISMA in Lima, Peru, and Johns Hopkins University in Baltimore, USA, will provide  
4  
5  
6 225 administrative oversight for the study. There will be a research coordinator at a central location  
7  
8 226 in Lima, Peru, who will provide logistical support and management of the study team. Instituto  
9  
10 227 Nacional de Salud del Niño will provide a team of study nurses and physicians to carry out  
11  
12 228 recruitment, physical examination, and collection of specimens. [We have also established prior](#)  
13  
14  
15 229 [Hospital Edgardo Rebagliati Martins will provide an ultrasonographer for imaging at his](#)  
16  
17 230 [institution and team member training by an experienced ultrasonographer to carry out](#)  
18  
19  
20 231 chest ultrasonography [at Hospital del Niño](#). A multidisciplinary team of clinicians, field  
21  
22 232 epidemiologists, acoustical engineers, and biostatisticians from Johns Hopkins University, Tufts  
23  
24 233 University, Cincinnati Children's Hospital, and Instituto Nacional de Salud del Niño will be  
25  
26  
27 234 involved with study design and conduct, statistical analysis, and reporting of results.  
28  
29  
30 235

### 31 236 **Questionnaire**

32  
33  
34 237 We will ask the parent or guardian about the child's past medical history, environmental  
35  
36 238 exposures, access to healthcare, and current respiratory symptoms. We will inquire about  
37  
38 239 demographic information, nutrition, and vaccination history. We will ask about co-morbidities,  
39  
40 240 family history, and developmental history. Environmental questions pertained to housing,  
41  
42 241 number of children, rural versus urban living, parent occupations, smoke and allergen exposure,  
43  
44 242 and sick contacts. Current respiratory symptoms were asked of the parent or guardian to answer  
45  
46 243 subjectively and included rapid breathing, difficulty breathing, chest indrawing, cyanosis, cough,  
47  
48 244 sputum production, audible breath sounds, and subjective fever.  
49  
50  
51  
52

53 245

### 54 55 246 **Physical exam and laboratory testing**

1  
2  
3 247 The initial set of vital signs will be recorded, including pulse oximetry. During the physical  
4  
5  
6 248 exam, a single examining physician from the larger group of study physicians will be responsible  
7  
8 249 for recording findings for a given patient with emphasis on the respiratory exam. Chest  
9  
10 250 retractions, nasal flaring, grunting, stridor, and accessory muscle use will be noted and  
11  
12 251 characterized if present, along with any adventitious lung sounds appreciated by physician and  
13  
14  
15 252 study team member on chest auscultation. Degree of improvement after bronchodilators will also  
16  
17 253 be recorded if administered. Additionally, signs of dehydration and malnutrition will be reported  
18  
19  
20 254 if present. Laboratory results will be recorded if evaluated by the ED and include complete blood  
21  
22 255 count, electrolytes, and arterial blood gas.  
23

24  
25  
26

### 27 **Electronic Auscultation**

28  
29 258 Parents will be allowed to position the patient supine or upright. The study team member will  
30  
31  
32 259 listen to eight auscultation sites using a ThinkLabs ds32a Digital Stethoscope and mp3 recorder,  
33  
34 260 for 10 seconds at each site, in the following order of placement: front top left and right,  
35  
36 261 fronterolateral bottom right and left, back top right and left, and back bottom left and right  
37  
38 262 (Figure 1). Auscultation will be performed at the participant's normal breathing patterns during  
39  
40  
41 263 recording without being asked to take deep breaths. We will allow only one repeat of  
42  
43 264 auscultation if recording is interrupted for any reason or due to unacceptable signal quality of the  
44  
45 265 first recording.  
46  
47

48  
49

### 50 **Lung ultrasound**

51  
52  
53 268 All participants will receive bilateral lung ultrasonography carried out on SonoSite portable  
54  
55 269 ultrasound machine with HFL38/13-6MHz and P17/5-1MHz MicroMaxx® transducers by a  
56  
57  
58  
59  
60

1  
2  
3 270 single ultrasound technician who has been trained to the standardized protocol. Patients will be  
4  
5  
6 271 examined in the supine position with each hemithorax divided into six sections: 2 anterior, 2  
7  
8 272 lateral, and 2 posterior. The posterior area is defined from the posterior axillary line to the  
9  
10  
11 273 paravertebral line. Longitudinal and oblique scans will be obtained at each of the chest zones.  
12  
13 274 Longitudinal scans allow visualization of the ribs with the pleural line under them[23].  
14  
15 275 Representative images from each section will be saved and later transferred to radiologists at an  
16  
17  
18 276 outside institution.

19  
20 277 To assess for pneumonia, 2 of 3 radiologists must agree on the description of ultrasound  
21  
22 278 images compatible with pneumonia. Consolidation will be determined by 1) the presence of  
23  
24 279 hypo- or anechoic images with loss of distinct pleural lines and 2) an irregular shredded border  
25  
26  
27 280 of the pleural line that is distinct from the lung line, termed the “shred sign.” Additional signs to  
28  
29 281 be reported will include punctate hyperechoic images reflecting air bronchograms, decreased  
30  
31  
32 282 lung sliding, and homogenous, hypoechoic images in the pleural space corresponding to pleural  
33  
34 283 effusions. Interstitial infiltrates will be determined by the presence of “lung rockets,” which  
35  
36 284 correlate to three or more B-lines in a longitudinal view between two ribs. Additional features to  
37  
38  
39 285 be reported include heterogenous echotexture, air and fluid bronchograms, lung pulse, and  
40  
41 286 additional B-lines [23].  
42

43  
44 287

#### 45 46 288 **Chest radiography**

47  
48 289 All case participants will undergo chest radiography. We will attempt postero-anterior and lateral  
49  
50 290 films but will allow an antero-posterior view if not possible. Digital images will be sent to a third  
51  
52  
53 291 party reading group blinded to clinical information. Using the WHO standardization of CXR  
54  
55 292 interpretation for pediatric pneumonia [24], radiologists will comment on quality as adequate,  
56  
57  
58  
59  
60

1  
2  
3 293 suboptimal, or unreadable and on the presence of pathology as consolidative or interstitial with  
4  
5  
6 294 or without pleural effusions. Radiographic evidence of pneumonia will be confirmed by  
7  
8 295 agreement by 2 out of 3 radiologist reports for a given patient. Additional pathologic findings not  
9  
10 296 previously characterized will also be recorded and reported to the patient's physician for further  
11  
12 297 intervention if necessary.  
13  
14

15 298

### 17 299 **Microbiological studies**

20 300 Blood, urine, and nasopharyngeal samples will be collected according to our study design  
21  
22 301 (Figure 2). Blood samples will be drawn for cultures and sensitivities. Urine will be tested for  
23  
24 302 detection of pneumococcal antigen and stored for PCR. Nasopharyngeal swabs will be tested for  
25  
26 303 respiratory viruses, along with culture and sensitivities. Respiratory pathogens tested by PCR  
27  
28 304 will include *Streptococcus pneumoniae*, *Haemophilus influenzae*, and respiratory syncytial virus.  
29  
30  
31

32 305

### 34 306 **Safety**

36 307 ~~In order to~~To ensure safety, the researcher collecting data is experienced with providing care to  
37  
38 308 children. The researcher will use this experience to minimize any discomfort the children may  
39  
40 309 have. All blood samples will be collected by a skilled nurse or phlebotomist.  
41  
42

43 310 We will adhere to hospital procedures for avoiding hospital acquired infections. We will  
44  
45 311 wash hands with soap and water or alcohol-based hand sanitizer before patient contact. We will  
46  
47 312 wear gloves, gowns and mask when required. We will clean the devices using alcohol swabs  
48  
49 313 before and after each use.  
50  
51

52 314

### 55 315 **Data quality and management**

1  
2  
3 316 Prior to data collection, a Manual of Operations will be developed to ensure standardization and  
4  
5 317 reliability and contain detailed instructions for all study procedures and guidelines for data  
6  
7  
8 318 collection. The manual will be revised as needed and distributed to members of the study team.  
9

10 319 All data are recorded first on paper case report forms and subsequently double-entered  
11  
12 320 using Microsoft ACCESS. Data sets will be cross-validated and errors corrected. Electronic lung  
13  
14 321 recordings will be transferred from the mp3 player to participant-specific files on the study  
15  
16 322 computer at least every other day and backed-up weekly. Digital CXR images will also be  
17  
18 323 uploaded to these files and backed-up similarly.  
19  
20  
21

22 324

### 23 24 325 **Analysis of lung sounds and statistics**

25  
26  
27 326 An important first step in CLSA is using common signal processing techniques to investigate  
28  
29 327 high and low frequency information using methods such as the Short-time Fourier Transform  
30  
31 328 (STFT), wavelet transforms, and P-spline bases. The second step will be extracting signal  
32  
33 329 processing features to train the classifier.  
34  
35

36 330 Based on preliminary recordings to date performed by our group in Baltimore (Figure 3),  
37  
38 331 we anticipate that wheeze can be characterized using features from the Fourier transform, such as  
39  
40 332 the existence and temporal stability of tonal peaks in the 300-1000 Hz range, while crackles  
41  
42 333 could be recognized using features such as amplitude, the presence of broad-band energy and the  
43  
44 334 duration of this energy. Features such as the decrease in signal energy with frequency can  
45  
46 335 characterize movement sounds. We have previously used time-frequency descriptors such as  
47  
48 336 Mel-frequency cepstral coefficients as features and anticipate they will be useful for CLSA but  
49  
50 337 may require temporal information as well. We will use the extracted features from signal  
51  
52 338 processing analyses for classification using machine learning algorithms including: nearest  
53  
54  
55  
56  
57  
58  
59  
60

1  
2  
3 339 neighbor methods, support vector machines, random forests, and gradient boosting. Primary  
4  
5 340 analysis will consist of a five-fold cross validation on the training set to calculate expected  
6  
7  
8 341 prediction errors. The training set will additionally be used to estimate areas under the curve for  
9  
10 342 our diagnostic algorithm, including CLSA, WHO algorithm, imaging, and physical exam  
11  
12 343 findings. Secondary analysis will include calculating sensitivities and specificities of  
13  
14 344 experimental diagnostic US for detection of pneumonia when compared to gold standards  
15  
16 345 (clinical diagnosis and CXR reading). Performance will be measured using logistic and  
17  
18 346 multinomial regression, receiver operating characteristic curves, and area under the curve.  
19  
20  
21  
22 347

## 23 24 348 **ETHICS AND DISSEMINATION**

25  
26  
27 349 Approval was obtained from the Ethics Committees of A.B. PRISMA in Lima, Peru, El Instituto  
28  
29 350 Nacional de Salud del Niño in Lima, Peru, and the Johns Hopkins University School of Medicine  
30  
31 351 in Baltimore, MD. Written informed consent will be obtained from a parent or guardian. Any  
32  
33 352 clinical information gained from participation in this study that could possibly change  
34  
35 353 management will be given to the child's physician for his/her discretion. All data and sensitive  
36  
37 354 information will be protected by being kept on encrypted devices or accessible only to study  
38  
39 355 members.  
40  
41  
42

43 356 Plans for dissemination include final publication following completion of the study  
44  
45 357 following the STARD guidelines for reporting diagnostic accuracy[25]. We aim to develop a free  
46  
47 358 online library of lung sounds for further enhancement of CLSA and the machine learning  
48  
49 359 algorithm, as well as for future research and clinical education.  
50

51  
52  
53 360 Funders have had no role in study design, nor will they have a role in the collection,  
54  
55 361 management, analysis, and interpretation of data; manuscript preparation; and future  
56  
57  
58  
59  
60



1  
2  
3  
4  
5  
6  
7  
8  
9  
10  
11  
12  
13  
14  
15  
16  
17  
18  
19  
20  
21  
22  
23  
24  
25  
26  
27  
28  
29  
30  
31  
32  
33  
34  
35  
36  
37  
38  
39  
40  
41  
42  
43  
44  
45  
46  
47  
48  
49  
50  
51  
52  
53  
54  
55  
56  
57  
58  
59  
60

362 | publications. The principal investigator will have ultimate authority over these aspects of  
363 | research.

For peer review only

1  
2  
3 364 **DISCUSSION**  
4

5 365 This study aims to investigate alternatives to improve the specificity of the WHO algorithm for  
6  
7  
8 366 pediatric pneumonia, namely electronic auscultation and chest ultrasonography. Utilizing  
9  
10 367 electronic auscultation, we intend to characterize and analyze lung sounds associated with  
11  
12 368 consolidative pneumonia, diffuse interstitial pneumonia, bronchiolitis, asthma, and upper  
13  
14 369 respiratory infections, to determine if these diagnoses can be differentiated from normal through  
15  
16 370 automated lung sounds, and to compare with chest ultrasound, WHO algorithm, and molecular  
17  
18 371 testing for etiology. By reporting a protocol for CLSA, we hope to encourage standardization and  
19  
20 372 expansion of recorded lung sounds via an online library for continued enhancement of machine  
21  
22 373 learning as well as for continued scientific research and clinical education.  
23  
24  
25  
26

27 374 We foresee our greatest challenge in maximizing the quality of recorded lung sounds. To  
28  
29 375 begin the study, we will utilize a commercial electronic stethoscope for recordings, which is  
30  
31 376 identical in design to standard clinical stethoscopes. However, through sound processing using  
32  
33 377 time-frequency analysis methods such as the Short-time Fourier Transform (STFT) and  
34  
35 378 Continuous Wavelet Transforms (CWT), we hope to enhance the signal-to-noise ratio for data  
36  
37 379 analysis and characterization. By examining additional features such as amplitude, we may also  
38  
39 380 be better able to identify crackles and consolidation. We also plan to test alternative recording  
40  
41 381 devices using piezoelectric microphones covered with a thin polymer that may be able to better  
42  
43 382 capture lung sounds. Based on our recordings to date, we anticipate that wheeze can be  
44  
45 383 differentiated from normal breath using features such as the existence and temporal stability of  
46  
47 384 tonal peaks in the 300-1000 Hz range, while crackle should be recognizable using features such  
48  
49 385 as the presence of broad-band energy and the duration of this energy. Features such as the  
50  
51 386 decrease in signal energy with frequency can characterize movement sounds. We have  
52  
53  
54  
55  
56  
57  
58  
59  
60

1  
2  
3 387 previously used time-frequency descriptors borrowed from speech processing (Mel-frequency  
4  
5 388 cepstral coefficients and their time derivatives) and cough-specific time-domain features such as  
6  
7  
8 389 signal rise time and event duration and anticipate they will be useful for CLSA. We will use the  
9  
10 390 extracted features from signal processing analyses for classification using machine learning  
11  
12 391 algorithms such as nearest neighbor methods, support vector machines, or random forests.

13  
14  
15 392 The largest challenge in regards to lung ultrasound will likely be obtaining adequate  
16  
17 393 quality of images and inter-user variability. To reduce variability, the study technician will be  
18  
19  
20 394 trained to systematically scan each subdivided hemithorax for pathologic findings described  
21  
22 395 previously [9,23], and if possible, we will attempt lung ultrasound twice for each patient.  
23  
24 396 Ultrasound also takes substantially longer compared to chest radiography because all areas must  
25  
26  
27 397 be adequately explored; therefore, it may be difficult for a child to be cooperative for that length  
28  
29 398 of time. Through our large sample size and detailed methods, we aim to improve standardization  
30  
31 399 of pediatric chest ultrasound and further define pathologic findings associated with disease,  
32  
33 400 which may also lead to more efficient and faster scanning.

34  
35  
36 401 Limitations to this study center mostly on our case definitions for clinical diagnoses. As  
37  
38 402 mentioned previously, there are no precise gold standards and as with many pediatric diseases,  
39  
40 403 diagnosis is clinical. As such, our end points are determined by clinical exam findings by single  
41  
42 404 examining physicians with additional confirmation via radiology for pneumonia cases only. We  
43  
44 405 acknowledge the variability of observed findings among physicians but also accept that this is  
45  
46 406 the mechanism of diagnosis in most clinical settings.

47  
48  
49  
50 407 The WHO algorithm for case management of pediatric pneumonia lacks diagnostic  
51  
52 408 specificity. While clinical information such as elevated heart rate and decreased oxygen  
53  
54 409 saturation may aid in degree of illness and monitoring, these data also lack specificity required to  
55  
56  
57  
58  
59  
60

1  
2  
3 410 drastically improve case management. Lung ultrasound is also a promising tool and offers  
4  
5  
6 411 portability that is not available for radiography. Ultrasound has the added benefit of pleural  
7  
8 412 effusion detection, which may prove an important adjunct to the electronic auscultation  
9  
10 413 algorithm. However, cost and availability of skilled technicians may greatly hamper its utility in  
11  
12 414 resource-poor settings, similar to microbiologic testing. Electronic auscultation is a simple,  
13  
14 415 inexpensive tool that could have great diagnostic impact on ALRI in children worldwide.  
15  
16  
17 416 Through further research, we foresee utilizing this tool with pre-programmed computerized  
18  
19  
20 417 analysis to improve case management in developing countries.  
21  
22 418

1  
2  
3  
4  
5  
6  
7  
8  
9  
10  
11  
12  
13  
14  
15  
16  
17  
18  
19  
20  
21  
22  
23  
24  
25  
26  
27  
28  
29  
30  
31  
32  
33  
34  
35  
36  
37  
38  
39  
40  
41  
42  
43  
44  
45  
46  
47  
48  
49  
50  
51  
52  
53  
54  
55  
56  
57  
58  
59  
60

419 **COMPETING INTERESTS**

420 All authors in the study report no competing interests.

421

For peer review only

1  
2  
3 422 **AUTHORS' CONTRIBUTIONS**  
4

5  
6 423 All authors were involved in the study design and writing of the manuscript, and all reviewed the  
7  
8 424 final manuscript before submission. Laura Ellington directly contributed to study design, and is  
9  
10 425 responsible for supervision of data gathering at the children's hospital in Lima, electronic  
11  
12 426 auscultation and chest ultrasound recordings, data management, analysis, and writing of this  
13  
14 427 manuscript. Robert Gilman provided mentorship to Laura Ellington and technical support for the  
15  
16 428 study. James Tielsch and Mark Steinhoff contributed to the concept and study design. Dante  
17  
18 429 Figueroa will serve as study physician, provide supervision and administrative oversight on site,  
19  
20 430 and perform physical testing. Shalim Rodriguez contributed to study design and was responsible  
21  
22 431 for developing and training the study technician to a standardized chest ultrasound protocol.  
23  
24  
25 432 Brian Caffo contributed to study design and will contribute to statistical analysis. Brian Tracey,  
26  
27 433 Mounya Elhilali, and James West contributed to study design and will contribute significantly to  
28  
29 434 signal processing and data analysis. William Checkley had ultimate oversight over study design  
30  
31 435 and administration, and was equally responsible writing of the manuscript, and serves as mentor  
32  
33 436 to Laura Ellington throughout the conduct of the study.  
34  
35  
36  
37  
38  
39  
40  
41  
42  
43  
44  
45  
46  
47  
48  
49  
50  
51  
52  
53  
54  
55  
56  
57  
58  
59  
60

437 **REFERENCES**

- 438 1 Sazawal S, Black RE. Effect of pneumonia case management on mortality in neonates,  
439 infants, and preschool children: a meta-analysis of community-based trials. *The Lancet*  
440 *Infectious Diseases* 2003;**3**:547–56.
- 441 2 Cardoso M-R a, Nascimento-Carvalho CM, Ferrero F, *et al.* Adding fever to WHO criteria  
442 for diagnosing pneumonia enhances the ability to identify pneumonia cases among  
443 wheezing children. *Archives of disease in childhood* 2011;**96**:58–61.
- 444 3 Puumalainen T, Quiambao B, Abucejo-Ladesma E, *et al.* Clinical case review: a method  
445 to improve identification of true clinical and radiographic pneumonia in children meeting  
446 the World Health Organization definition for pneumonia. *BMC infectious diseases*  
447 2008;**8**:95.
- 448 4 Hazir T, Nisar YB, Qazi S a, *et al.* Chest radiography in children aged 2-59 months  
449 diagnosed with non-severe pneumonia as defined by World Health Organization:  
450 descriptive multicentre study in Pakistan. *BMJ (Clinical research ed)* 2006;**333**:629.
- 451 5 Hazir T, Nisar YB, Abbasi S, *et al.* Comparison of oral amoxicillin with placebo for the  
452 treatment of world health organization-defined nonsevere pneumonia in children aged 2-  
453 59 months: a multicenter, double-blind, randomized, placebo-controlled trial in Pakistan.  
454 *Clinical infectious diseases: an official publication of the Infectious Diseases Society of*  
455 *America* 2011;**52**:293–300.
- 456 6 Madico G, Gilman RH, Jabra A, *et al.* The role of pulse oximetry: its use as an indicator  
457 of severe respiratory disease in Peruvian children living at sea level. *Archives of*  
458 *Pediatrics and Adolescent Medicine* 1995;**149**:1259.

- 1  
2  
3 459 7 Schult S, Canelo-Aybar C. Oxygen saturation in healthy children aged 5 to 16 years  
4  
5 residing in Huayllay, Peru at 4340 m. *High altitude medicine & biology* 2011;**12**:89–92.  
6 460  
7  
8 461 8 Iuri D, De Candia a, Bazzocchi M. Evaluation of the lung in children with suspected  
9  
10 462 pneumonia: usefulness of ultrasonography. *La Radiologia medica* 2009;**114**:321–30.  
11  
12  
13 463 9 Parlamento S, Copetti R, Di S. Evaluation of lung ultrasound for the diagnosis of  
14  
15 464 pneumonia in the ED. *European Respiratory Journal* 2009:379–84.  
16  
17  
18 465 10 Yang PC, Luh KT, Chang DB, Yu CJ, Kuo SH WH. Ultrasonographic Evaluation of  
19  
20 466 Pulmonary Consolidation. *American Review of Respiratory disease* 1992;**146**:757–62.  
21  
22  
23 467 11 Su YH, Wang M, Block TM, *et al.* Transrenal DNA as a diagnostic tool: Important  
24  
25 468 technical notes. *Annals of the New York Academy of Sciences* 2004;**1022**:81–9.  
26  
27  
28 469 12 Gehmacher o, Mathis G, Kopf A, *et al.* Ultrasound imaging of pneumonia. *Ultrasound in*  
29  
30 470 *med & biol* 1995;**21**:1119–22.  
31  
32  
33 471 13 Lichtenstein D, Lascols N, Mezière G, *et al.* Ultrasound diagnosis of alveolar  
34  
35 472 consolidation in the critically ill. *Intensive care medicine* 2004;**30**:276–81.  
36  
37  
38 473 14 Murphy R, Vyshedskiy A, Charnitsky V, *et al.* Automated lung sound analysis in patients  
39  
40 474 with pneumonia. *Respiratory Care* 2004;**49**:1490–07.  
41  
42  
43 475 15 Grenier M, Gagnon K, Genest J, *et al.* Clinical comparison of acoustic and electronic  
44  
45 476 stethoscopes and design of a new electronic stethoscope. *American Journal of Cardiology*  
46  
47 477 1998;**81**:653–6.  
48  
49  
50 478 16 Gurung A, Scrafford C, Tielsch J, *et al.* Computerized lung sound analysis as a diagnostic  
51  
52 479 aid for the detection of abnormal lung sounds: A systematic review and meta-analysis.  
53  
54 480 *Respiratory Medicine* 2011;**doi:10.101**.



- 1  
2  
3 481 17 Abaza A a, Day JB, Reynolds JS, *et al.* Classification of voluntary cough sound and  
4  
5  
6 482 airflow patterns for detecting abnormal pulmonary function. *Cough (London, England)*  
7  
8 483 2009;**5**:8.  
9
- 10 484 18 Reichert S, Gass R, Brandt C, *et al.* Analysis of respiratory sounds: state of the art.  
11  
12 485 *Clinical medicine Circulatory, respiratory and pulmonary medicine* 2008;**2**:45–58.  
13  
14
- 15 486 19 Lu X, Bahoura M. An integrated automated system for crackles extraction and  
16  
17 487 classification. *Biomedical Signal Processing and Control* 2008;**3**:244–54.  
18  
19
- 20 488 20 Marshall A, Boussakta S. Signal analysis of medical acoustics sounds with applications to  
21  
22 489 chest medicine. *J Franklin Institute* 2007;**344**:230–42.  
23  
24
- 25 490 21 Taplidou S, Hadjileontiadis L, Kitsas I, *et al.* On applying continuous wavelet transform  
26  
27 491 in wheeze analysis. *IEEE EMBS* 2004;:3832–5.  
28
- 29 492 22 Saeed S, Body R. Auscultating to diagnose pneumonia. *EMJ* 2007;**24**:294–6.  
30  
31
- 32 493 23 Volpicelli G, Silva F, Radeos M. Real-time lung ultrasound for the diagnosis of alveolar  
33  
34 494 consolidation and interstitial syndrome in the emergency department. *European Journal of*  
35  
36 495 *Emergency Medicine* 2010;**17**:63–72.  
37  
38
- 39 496 24 Standardization of interpretation of chest radiographs for the diagnosis of pneumonia in  
40  
41 497 children World Health Organization Pneumonia Vaccine Trial Investigators ' Group  
42  
43 498 DEPARTMENT OF VACCINES. *World Health* 2001.  
44  
45
- 46 499 25 Bossuyt PM, Reitsma JB, Bruns DE, *et al.* Towards complete and accurate reporting of  
47  
48 500 studies of diagnostic accuracy: the STARD initiative. *BMJ (Clinical research ed)*  
49  
50 501 2003;**326**:41–4.  
51  
52
- 53 502  
54  
55  
56  
57  
58  
59  
60

1  
2  
3 503 **Figure 1. Order of auscultation by electronic stethoscope.** The study team member will listen  
4  
5  
6 504 to each site, starting with “A” for 10 seconds each.  
7

8 505

9  
10 506 **Figure 2. Microbiology testing schematic.**  
11

12 507

13  
14  
15 508 **Figure 3. Preliminary data suggest a difference in spectral analysis between children with**  
16  
17 **and without wheeze.** Short-time FFT analysis was utilized to visualize spectrograms of a normal  
18 509  
19 control (A) and asthmatic child with active wheeze (B). Representative sample is from  
20 510  
21 preliminary recordings taken from the Emergency Room at the Johns Hopkins Hospital in  
22 511  
23 Baltimore, MD.  
24 512  
25  
26

27 513  
28  
29  
30  
31  
32  
33  
34  
35  
36  
37  
38  
39  
40  
41  
42  
43  
44  
45  
46  
47  
48  
49  
50  
51  
52  
53  
54  
55  
56  
57  
58  
59  
60

1  
2  
3  
4  
5  
6  
7  
8  
9  
10  
11  
12  
13  
14  
15  
16  
17  
18  
19  
20  
21  
22  
23  
24  
25  
26  
27  
28  
29  
30  
31  
32  
33  
34  
35  
36  
37  
38  
39  
40  
41  
42  
43  
44  
45  
46  
47  
48  
49  
50  
51  
52  
53  
54  
55  
56  
57  
58  
59  
60

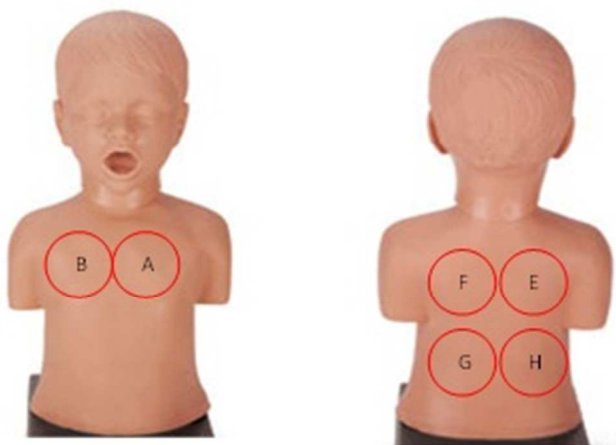

Figure 1. Order of auscultation by electronic stethoscope. The study team member will listen to each site, starting with "A" for 10 seconds each.

82x60mm (96 x 96 DPI)

er review only

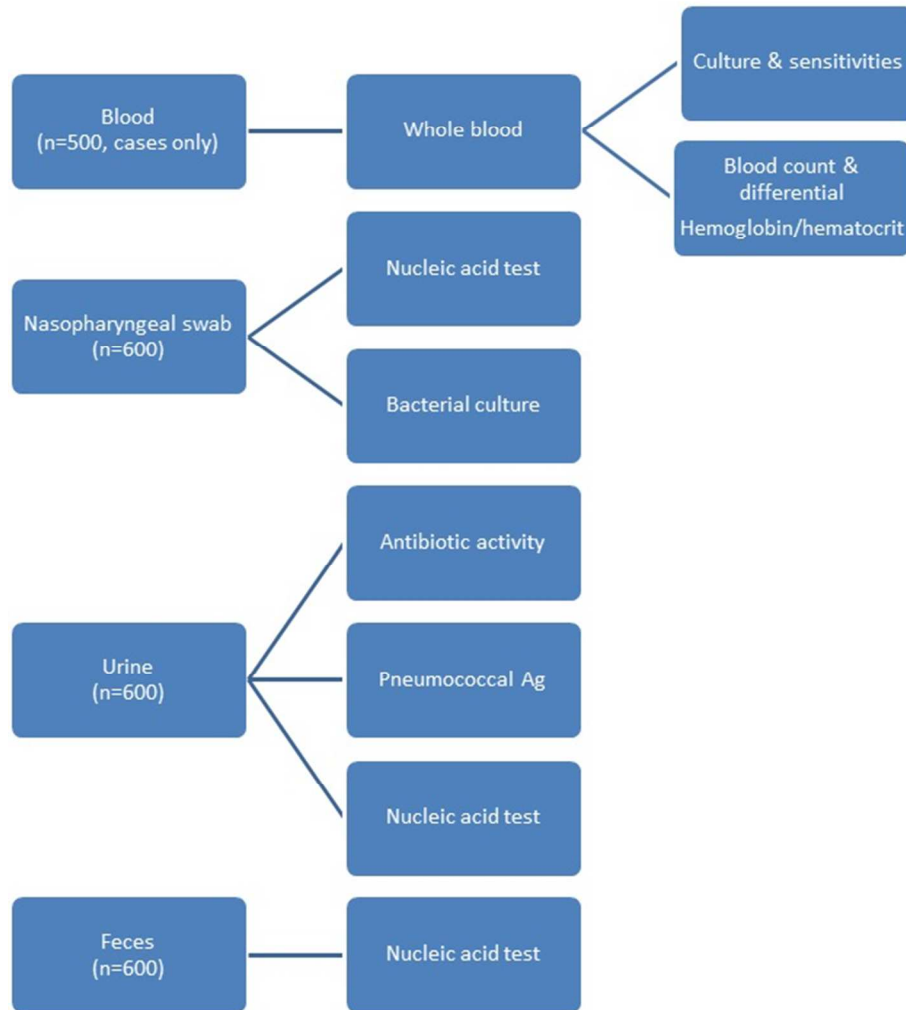

Figure 2. Microbiology testing schematic.  
165x218mm (96 x 96 DPI)

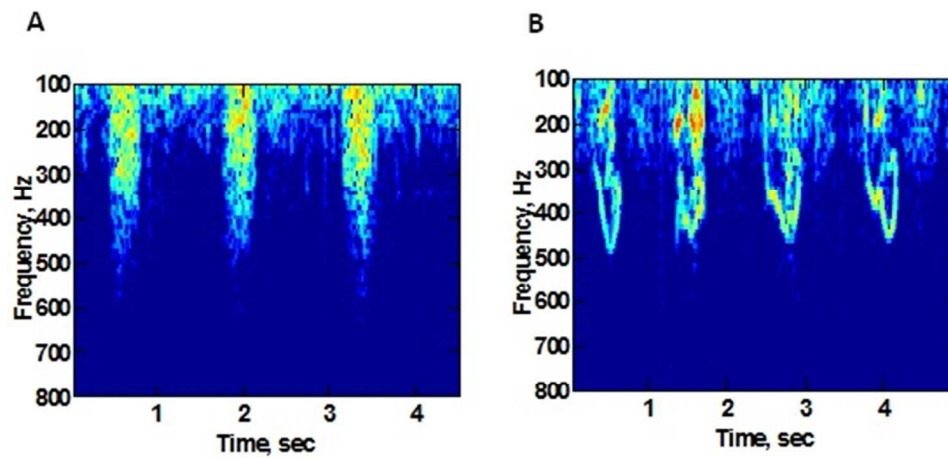

Figure 3. Preliminary data suggest a difference in spectral analysis between children with and without wheeze. Short-time FFT analysis was utilized to visualize spectrograms of a normal control (A) and asthmatic child with active wheeze (B). Representative sample is from preliminary recordings taken from the Emergency Room at the Johns Hopkins Hospital in Baltimore, MD.  
151x74mm (96 x 96 DPI)

**STARD checklist for reporting of studies of diagnostic accuracy**  
(version January 2003)

| Section and Topic           | Item # |                                                                                                                                                                                                                                                     | On page #    |
|-----------------------------|--------|-----------------------------------------------------------------------------------------------------------------------------------------------------------------------------------------------------------------------------------------------------|--------------|
| TITLE/ABSTRACT/<br>KEYWORDS | 1      | Identify the article as a study of diagnostic accuracy (recommend MeSH heading 'sensitivity and specificity').                                                                                                                                      | 1,2          |
| INTRODUCTION                | 2      | State the research questions or study aims, such as estimating diagnostic accuracy or comparing accuracy between tests or across participant groups.                                                                                                | 8,9          |
| <b>METHODS</b>              |        |                                                                                                                                                                                                                                                     |              |
| <i>Participants</i>         | 3      | The study population: The inclusion and exclusion criteria, setting and locations where data were collected.                                                                                                                                        | 11           |
|                             | 4      | Participant recruitment: Was recruitment based on presenting symptoms, results from previous tests, or the fact that the participants had received the index tests or the reference standard?                                                       | 11           |
|                             | 5      | Participant sampling: Was the study population a consecutive series of participants defined by the selection criteria in item 3 and 4? If not, specify how participants were further selected.                                                      | 11           |
|                             | 6      | Data collection: Was data collection planned before the index test and reference standard were performed (prospective study) or after (retrospective study)?                                                                                        | 10           |
| <i>Test methods</i>         | 7      | The reference standard and its rationale.                                                                                                                                                                                                           | 11,12        |
|                             | 8      | Technical specifications of material and methods involved including how and when measurements were taken, and/or cite references for index tests and reference standard.                                                                            | 14-16        |
|                             | 9      | Definition of and rationale for the units, cut-offs and/or categories of the results of the index tests and the reference standard.                                                                                                                 | 14-16        |
|                             | 10     | The number, training and expertise of the persons executing and reading the index tests and the reference standard.                                                                                                                                 | 11-12, 14-16 |
|                             | 11     | Whether or not the readers of the index tests and reference standard were blind (masked) to the results of the other test and describe any other clinical information available to the readers.                                                     | 11-12        |
| <i>Statistical methods</i>  | 12     | Methods for calculating or comparing measures of diagnostic accuracy, and the statistical methods used to quantify uncertainty (e.g. 95% confidence intervals).                                                                                     | 18           |
|                             | 13     | Methods for calculating test reproducibility, if done.                                                                                                                                                                                              | N/A          |
| <b>RESULTS</b>              |        |                                                                                                                                                                                                                                                     |              |
| <i>Participants</i>         | 14     | When study was performed, including beginning and end dates of recruitment.                                                                                                                                                                         | N/A          |
|                             | 15     | Clinical and demographic characteristics of the study population (at least information on age, gender, spectrum of presenting symptoms).                                                                                                            | N/A          |
|                             | 16     | The number of participants satisfying the criteria for inclusion who did or did not undergo the index tests and/or the reference standard; describe why participants failed to undergo either test (a flow diagram is strongly recommended).        | N/A          |
| <i>Test results</i>         | 17     | Time-interval between the index tests and the reference standard, and any treatment administered in between.                                                                                                                                        | N/A          |
|                             | 18     | Distribution of severity of disease (define criteria) in those with the target condition; other diagnoses in participants without the target condition.                                                                                             | N/A          |
|                             | 19     | A cross tabulation of the results of the index tests (including indeterminate and missing results) by the results of the reference standard; for continuous results, the distribution of the test results by the results of the reference standard. | N/A          |
|                             | 20     | Any adverse events from performing the index tests or the reference standard.                                                                                                                                                                       | N/A          |
| <i>Estimates</i>            | 21     | Estimates of diagnostic accuracy and measures of statistical uncertainty (e.g. 95% confidence intervals).                                                                                                                                           | N/A          |
|                             | 22     | How indeterminate results, missing data and outliers of the index tests were handled.                                                                                                                                                               | N/A          |
|                             | 23     | Estimates of variability of diagnostic accuracy between subgroups of participants, readers or centers, if done.                                                                                                                                     | N/A          |
|                             | 24     | Estimates of test reproducibility, if done.                                                                                                                                                                                                         | N/A          |
| DISCUSSION                  | 25     | Discuss the clinical applicability of the study findings.                                                                                                                                                                                           | N/A          |
