# Supplementary material for: Computerised lung sound analysis to improve the specificity of paediatric pneumonia diagnosis in resource-poor settings: protocol and methods for an observational study
Source: PubMed Central journal article supplement — BMJ Open. 2012 Feb 3;2(1):e000506. doi: 10.1136/bmjopen-2011-000506 (PMC3274713; doi:10.1136/bmjopen-2011-000506), 2012-02-03
Supplement: bmjopen-2011-000506.reviewer_comments.pdf [file bmjopen-2011-000506.reviewer_comments.pdf]

**This study protocol was internally peer reviewed and therefore no reviewer comments are available.**
